# Supplementary material for: Determinants of Improved Technology Use in Dairy Production in Case of North Gondar
Source: Research Square preprint supplement (doi:10.21203/rs.3.rs-344628/v1), 2021-03-25
Supplement: Supplementary file 1 [file 761b5e3bfbc258b40a9e8aa1.xlsx]

## Sheet: Data dairy mega
kebele	Adoptionstatus	breed_cow	local_cow	vistiby_da	inf_mkt	dairy_exp	TLU	age	land_farm	coop	offfarm	dis_mkt	acc_credit	marttial	milkper_day	hhid	name	sex	educ	famsz	land_size	trans	easy_input	mtraining	mem_coop	grazing	dairy_land	dis_asphalt	agreement	cow	jersi	holisty	otherb	hefer	ox	calf	weyfen	sheep	goat	donkey	horse	muel	hen	bee	bull	others	mnt_cons	milkjersi	milkholisti
Shimara	non adopter	0	2	three times a month	no	6	2.4	38	2	yes	no	20	no	married	2	1	mikael molla	male	illiterate	6.25	3	yes	yes	no	high	1	1	5	no	2	0	0	0	2	0	1	0	0	0	1	0	0	0	0	0	0	3000	0	0
shimara	non adopter	0	2	others	no	17	6.947	57	3	no	no	30	no	married	2	2	melisew welela	male	illiterate	3.5	6	yes	no	no	high	3	3	30	no	2	0	0	0	4	2	2	1	0	0	1	0	0	7	2	0	0	1500	0	0
Shimara	non adopter	0	1	others	no	40	2.439	65	2	no	no	30	no	married	1	3	mekete Gebeye	male	above	3.75	3	no	no	no	high	1	1	20	no	1	0	0	0	1	0	1	1	0	0	1	0	0	3	0	0	0	1600
shimara	adopter	1	1	others	no	15	1.976	45	2	no	no	30	no	widowed	2	4	tigab aschenef	female	illiterate	4.15	3	no	no	no	very high	1	0.5	20	no	2	1	0	0	1	1	1	0	0	0	0	0	0	2	0	0	0	1400	1	0
shimara	adopter	3	0	three times a month	yes	15	1.35	65	2	yes	no	20	no	married	3	5	sisay damtea	male	illiterate	1.75	4	no	no	no	high	2	2	5	no	3	3	0	0	1	0	3	0	0	0	0	0	0	0	0	0	0	1000	3	0
shimara	adopter	2	0	once a month	yes	20	4.152	60	2	yes	no	30	no	married	12	6	azanaw shibabawu	male	illiterate	6.4	6	no	yes	yes	very high	1	1	20	yes	2	2	0	0	1	2	3	0	0	0	0	0	0	4	0	1	0	1500	12	0
shimara	adopter	1	1	once a month	yes	40	3.426	62	3	yes	no	30	no	married	2	7	kenaw shibabawu	male	read and write	5.4	6	yes	yes	yes	very high	2	2	5	no	1	0	0	0	2	1	1	0	0	0	1	0	0	2	0	0	0	3000	0	0
shimara	non adopter	0	1	once a month	yes	5	5.736	35	3	yes	no	30	no	married	1	8	shimengewu tadege	male	above	6.9	5	yes	yes	no	high	2	1	2	no	2	0	0	0	1	1	1	0	2	0	5	0	0	2	0	0	0	3000	0	0
shimara	non adopter	0	2	once a month	no	30	3.06	66	3	no	yes	30	yes	married	2	9	birhan ketema	male	read and write	5	6	no	yes	no	very high	1	2	15	no	2	0	0	0	1	1	2	0	0	5	0	0	0	20	0	0	0	1800	0	0
shimara	non adopter	0	1	once a month	yes	15	1.726	35	1	yes	no	30	no	married	2	10	kassaw alem	male	read and write	6	3	no	yes	no	very high	3	1	20	no	1	0	0	0	0	0	1	2	0	0	0	0	0	2	0	0	0	2000	0	0
shimara	non adopter	0	2	once a month	yes	50	5.662	68	4	yes	no	60	no	married	6	11	tsega yehuala	male	illiterate	4.85	8	no	yes	yes	very low	2	2	60	yes	2	0	0	0	1	2	1	1	0	1	1	1	0	2	2	0	0	1900	0	0
shimara	non adopter	0	1	three times a month	yes	40	4.239	65	2	no	no	30	no	married	2	12	banteyhun haylu	male	read and write	3.75	62	yes	yes	yes	high	2	2		yes	1	0	0	0	2	2	0	0	0	0	1	0	0	3	0	0	0	1000	0	0
shimara	non adopter	0	2	once a month	yes	50	3.756	72	2	yes	no	30	no	married	2	13	aragaw kebede	male	illiterate	4.25	4	yes	yes	yes	very high	1	1		yes	2	0	0	0	1	1	2	1	1	0	1	0	0	2	0	0	0	1000	0	0
shimara	adopter	1	0	once a month	yes	30	4.635	56	1	yes	no	30	no	married	0	14	derbew gebeye	male	illiterate	5.5	4	no	yes	no	very low	1	1	25	no	1	0	1	2	2	2	1	1	0	1	0	0	0	4	1	0	0	800	0	2
shimara	adopter	1	1	once a month	yes	14	7.336	43	2	yes	no	30	no	married	2	15	alemadis mengstu	male	illiterate	7.95	4	yes	yes	no	high	1	1		no	3				3	2	3	2	0	2	1	0	0	2	0	0	0	1500	1
shimara	non adopter	0	1	others	no	25	1.906	38	1	no	no	60	no	married	1	16	sisay assefa	male	read and write	7.5	2	no	no	no	very high	1	1	15	no	1	0	0	0	1	1	0	0	0	1	0	0	0	2	0	0	0	2000	0	0
shimara	non adopter	0	3	once a month	no	40	2.142	65	3	no	no	25	no	married	4	17	zemene alene	male	illiterate	5.5	5	yes	yes	no	very high	2	2	5	no	3	0	0	0	2	0	3	0	0	0		0	0	3	1	0	0	2000	0	0
shimara	adopter	1	1	once a month	yes	28	8.389	45	1	no	yes	20	no	married	3	18	guadea abebe	male	read and write	6.65	3	yes	yes	no	high	1	1	20	no	1	0	1	0	1	2	1	1	1	5	4	1	0	0	3	0	0	2400	0	3
shimara	adopter	1	1	once a month	yes	25	3.676	40	3	no	no	30	no	married	1	19	dereje teshome	male	read and write	7.5	6	no	yes	no	very high	2	1		no	1	0	0	0	0	2	1	1	0	0	1	0	0	2	0	0	0	1000
shimara	adopter	2	0	once a month	yes	15	3.028	40	1	yes	no	10	no	married	12	20	kassaw mar	male	above	3.1	3	yes	yes	yes	very high	1	1	30	no	2	2	0	0	0	1	2	1	1	0	1	0	0	3	3	0	0	2000	12	0
shimara	non adopter	0	1	once a month	yes	25	5.405	45	2	yes	yes	30	no	married	2	21	gashaw mengstu	male	read and write	6.4	4	yes	yes	yes	very high	2	1	20	yes	1	0	0	0	1	2	1	1	0	2	2	0	0	3	2	0	0	500	0	0
shimara	non adopter	0	3	twice a month	yes	60	4.424	75	4	yes	no	30	no	married	2	22	asmamaw fula	male	read and write	3.75	6	yes	yes	yes	high	2	1	30	yes	3	0	0	0	3	1	2	0	0	0	1	0	0	5	3	0	0	1500
shimara	non adopter	0	1	once a month	yes	20	1.963	45	1	no	yes	30	no	married	1	23	atanawu takele	male	read and write	5.2	2	yes	yes	no	very high	1	1	20	no	1	0	0	0	1	1	1	0	0	0	0	0	0	1	0	0	0	1500	0	0
shimara	adopter	1	1	once a month	yes	10	5.332	57	2	yes	no	60	no	married	2	24	teshome	male	read and write	9.4	6	yes	yes	no	very low	1	1		no	1	1			2	2	1	1	0	1	1	0	0	4	0	0	0	1000
shimara	adopter	2	1	once a month	yes	4	5.182	46	1	yes	no	10	no	married	2	25	gashaw	male	read and write	6.95	3	yes	yes	no	very high	1	1	10	no	4		1		1	2	4	1	0	1	1	0	0	4	0	0	0	1000
santatikim	adopter	2	2	once a month	no	38	12.28	52	4	no	no	50	no	married	5	26	abebe tebeje	male	illiterate	8	5	no	yes	yes	medium	0.25	0.25	40	no	1	1			2	2	1	1	7	2	2	2	2	8	2	1	0	900	2
santatikim	adopter	1	2	four times a month	no	28	6.716	50	5	no	no	50	no	married	4	27	melak dessie	male	illiterate	3.85	6	no	no	yes	low	0.25	0.25		no	2	2			1	2	1	0	18	0	2	0	0	2	0	0	0	1000	2
santatikim	adopter	1	2	once a month	no	32	19.04	58	4	no	no	50	no	married	8	28	sisay takele	male	illiterate	3.85	5	no	no	no	medium		5	40	no	3	1			2	2	0	7	3	0	0	1	8	0	0	0	0	950	4
santaatikim	adopter	2	0	others	no	20	6.357	40	5	no	no	45	no	married	6	29	sito tilaye	male	illiterate	4.15	6	no	no	no	low	0.25	1.25	50	no	2	2			1	1	1	1	8	0	2	1	0	9	0	0	0	900	4
santatikim	adopter	2	0	others	no	40	6.642	21	6	no	no	60	no	married	8	30	gilea gidey	male	read and write	8.4	7	no	no	no	medium	1	1	60	no	2	2			1	2	1	1	3	0	2	1	0	4	0	0	0	1200	4
santatikim	adopter	1	1	once a month	no	40	8.978	60	5	no	no	23	no	married	3	31	ayanaw andargea	male	illiterate	5.95	6	no	no	no	low	1	1	40	no	2	1			2	2	2	2	2	3	1	1	1	1	5	0	1	2700	2
santatikim	adopter	11	2	once a month	no	35	19.326	67	3	yes	yes	60	no	single	11	32	aregaw getaneh	male	read and write	9.75	4	yes	no	no	medium	0.25	2	60	no	5	2			2	2	3	4	30	4	3	2	1	12	0	3	0	2000	3	4
santatikim	adopter	1	2	once a month	no	28	7.084	47	5	no	yes	40	no	married	6	33	jenberu	male	illiterate	4.15	6	no	no	no	low	0.25	0.25	40	no	2	1			1	2	1	1	6	0	2	1	0	8	0	0	0	1000	2
santatikim	adopter	2	1	others	no	28	5.414	60	7	no	no	60	no	married	6	34	G/meskel	male	read and write	5.15	8	no	no	no	low	0.25	1	60	no	3	2			1	2	1	1	3	3	1	0	0	18	0	0	0	1100	2
santatikim	adopter	1	1	others	no	21	12.348	43	0.25	yes	yes	2	no	married	3	35	marye	male	illiterate	5.25	7	yes	no	no	low	0.25	1	50	no	3	1			1	2	1	1	7	1	1	1	1	16	0	6	0	900	2
kosoye anbaras	adopter	1	1	twice a month	yes	30	11.25	58	0.5	no	no	100	no	married	2	36	ketema	male	read and write	2.75	0.75	yes	no	no	very low	0.25	0.5	3	no	2		1		1	1	2	1	5	0	0	1	6	0	0	0	2	1600
kosoye ambaras	adopter	1	0	once a month	no	18	4.001	67	1	yes	no	21	no	married	1	37	tarekegni	male	read and write	2.65	1.5	yes	no	no	medium	0.5	0	1	no	1	1			0	1	1	0	7	0	1	1	0	7	0	0	0	1000
kosoye ambaras	adopter	1	1	twice a month	yes	40	4.712	65	0.75	no	yes	4	no	married	2	38	dubea	male	read and write	3.4	1	no	no	no	medium	0.25	0		no	2				1	1	1	0	7	0	1	1	0	4	0	0	0	1300
kossoye ambaras	non adopter	0	2	once a month	no	20	2.989	42	1.5	no	yes	15	no	married	2	39	kess adisu	male	read and write	2.45	2	no	no	no	low	0.5	0		yes	1				0	1	1	0	5	0	0	1	0	3	0	0	0	900
kossoye ambaras	non adopter	0	1	twice a month	no	10	4.852	38	1.5	no	no	30	no	married	2	40	getalem	male	read and write	3.3	2	no	no	no	high	0.5	0	3	yes	1				0	2	2	0	10	0	0	1	0	4	0	0	0	400
yekirar	adopter	2	0	twice a month	yes	5	6.364	60	0.5	no	no	50	no	widowed	15	46		male	illiterate	3.75	1	no	yes	no	very low	0.5	0.5	20	yes	1	1	1		1	0	1	2	7	0	1	2	0	8	0	0	0	1800
yekirar	adopter	1	0	twice a month	yes	2	6.111	32	0.5	no	yes	41	no	married	4	47		female	read and write	2.5	1	no	yes	no	low	0.5	0.5	40	yes	1		1		0	1	1	1	6	0	0	3	0	6	1	0	0	850		1
yekirar	adopter	1	0	twice a month	yes	3	7.318	38	1	no	yes	43	yes	married	8	48		male	read and write	4.15	1.5	no	yes	no	very low	0.5	0.5	40	yes	1	1			1	1	1	0	7	0	0	2	2	4	2	0	0	1800	8
yekirar	adopter	1	0	twice a month	yes	5	6.339	40	0.5	no	yes	30	yes	married	3	49		male	read and write	4.85	2	no	yes	no	very low	0.5	0.25	30	no	1		1		1	0	1	1	10	0	0	3	0	3	0	0		790
yekirar	adopter	1	1	twice a month	5	2	5.025	31	2	no	yes	30	no	married	6	50		male	above	2.95	1	yes	yes	no	very low			30	yes	1		1		1	0	1	1	3	0	1	2	0	2	3	0	0	2000
Yekrar woganba	non adopter	0	0	others	yes	3	8.3853	37	2	no	yes	40	no	married	14	51		male	read and write	3.85	1	yes	yes	no	very low	0.25	0.5	35	yes	2				0.75	1	0.4		1.56		0.7	4.4	1.1					2075
Yekrar woganba	non adopter	0	0	others	yes	4	5.91024	35	0.5	no	yes	45	no	married	9	52		male	read and write	4.9	1	no	yes	no	very low	0.5	0.5	40	yes	2				0.75		0.2		7.13			3.3		0.065		1		3000
Yekrar woganba	adopter	1	0	others	yes	4	7.76829	41	1.5	no	yes	25	no	married	4	53		male	read and write	6.9	2	no	yes	no	very low	0.25	0.25	30	yes	1					1	0.2		1.17	0.15	0.7	4.4	1.1	0.13	5			2000
Yekrar woganba	non adopter	0	0	others	yes	3	8.53239	45	0.5	no	yes	45	no	married	8	54		male	read and write	3.95	1	no	yes	no	very low	0.5	0.5	45	yes	2				0.75		0.4		1.04		0.7	5.5	1.1	0.13	1			1580
Yekrar woganba	non adopter	0	0	others	yes	3	7.54945	48	1.5	no	yes	27	no	married	5	55		male	read and write	5.75	2	no	yes	no	very low	0.5	0.25	25	yes	1						0.2		1.82			5.5	1.1	0.065	4			1950
Yekrar woganba	non adopter	0	0	others	yes	2	6.43689	42	0.5	no	yes	50	no	married	6	56		male	read and write	4.15	1	no	yes	no	very low	0.5	0.5	50	yes	1				0.75	1	0.2		1.69		1.4	3.3		0.13	1			1615
Yekrar woganba	adopter	2	0	others	yes	5	7.70928	39	0.5	no	no	35	no	married	8	57		male	above	5.7	2	no	yes	no	very low	0.5	0.5	37	yes	2				0.75	1	0.4		1.82		1.4	3.3	1.1	0.091	3			2500
Yekrar woganba	adopter	3	0	others	yes	5	12.8728	56	2	no	no	45	yes	married	15	58		male	illiterate	6.9	3	no	yes	no	very low	1.5	0.5	45	yes	3				0.75	2	0.4		2.21		2.1	5.5	2.2		1			3000
mekana	adopter	2	0	once a month	no	3	4.75501	40	3	no	no	40	no	married	4	59		male	illiterate	4.5	4	no	no	no	very low	1		20	yes	2					1	0.2		0.65			1.1	2.2	0.039				2600
mekana	adopter	1	0	once a month	no	3	1.2438	28	5	yes	no	50	no	married	2	60		male	illiterate	4.75	6	no	no	no	very low	1	0.25	10	no	1								0.26			1.1						1378
mekana	adopter	2	0	once a month	no	2	2.49448	40	2	no	no	30	no	married	4	61		male	read and write	5.1	3	no	no	no	very low	1		30	no	2						0.2		0.26			2.2		0.052				2000
mekana	adopter	2	0	twice a month	no	3	3.45314	50	3	yes	no	40	no	married	6	62		male	read and write	7.25	4	no	no	no	very low	1		30	no	2					2	0.2		1.3	0.26		1.1		0.026				2800
mekana	adopter	1	0	twice a month	no	2	4.23301	45	5	yes	no	20	yes	married	3	63		male	read and write	7.25	6	no	no	no	very low	1		5	yes	1				0.75		0.2					3.3		0.039				1880
mekana	adopter	2	0	twice a month	no	7	5.0398	60	4	yes	no	40	no	widowed	4	64		female	illiterate	9	6	no	no	no	very low	2		20	no	2				0.75	2	0.2					2.2	0.013		1			2500
mekana	non adopter	0	0	twice a month	no	6	4.2432	55	3	yes	no	30	no	married	6	65		male	read and write	7.25	4	no	no	yes	very low	1		1	no	2				0.75				0.39			1.1	2.2					1900
mekana	adopter	1	0	three times a month	no	2	2.60218	50	3	yes	no	30	no	single	3	66		female	read and write	7.75	4	no	no	no	medium	1		5	no	1								1.3			1.1	1.1	0.091	4			2160
mekana	adopter	3	0	once a month	no	6	3.17798	40	2	yes	no	60	no	married	9	67		male	read and write	2.5	3	no	no	yes	high	1		30	no	3				0.75		0.2		1.17			2.2		0.26				3000	3
mekana	adopter	1	0	once a month	no	2	7.66518	57	2	yes	no	30	yes	married	2	68		female	read and write	3.75	4	no	no	yes	very low			40	no	1	1			1.5	1	0.2		1.3		0.7	1.1	3.3	0.091				3000
mekana	non adopter	0	0	twice a month	no	5	0.043	60	1	yes	yes	30	no	single	2	69		female	illiterate	6.75	2	no	no	yes	medium	0.25	0.25	40	yes	1						0.2								1			2500		2
mekana	non adopter	0	0	twice a month	no	2	2.5845	45	2	yes	no	30	no	married	2	70		male	read and write	1.4	3	no	no	no	medium	1	0.25	10	no	2						0.4		0.65				2.2					1430
mekana	adopter	2	0	once a month	no	2	7.0664	50	1	yes	no	45	yes	married	2	71		male	illiterate	6.25	3	no	no	no	high			15	no	2				1.5	1			0.78			3.3	1.1					1560
mekana	adopter	1	0	twice a month	no	2	1.81368	35	2	yes	no	60	no	married	2	72		male	read and write	1.75	3	no	no	no	very high	1	0.25	40	no	1				0.75		0.2					1.1		0.091				1330
mekana	adopter	2	0	twice a month	yes	2	4.38511	48	2	no	yes	30	no	married	4	73		male	read and write	6.5	2	no	no	no	medium		0.25	20	no	2				0.75		0.2		1.17			2.2	1.1	0.039				2000
mekana	adopter	1	0	three times a month	no	1	2.629	75	1	yes	no	30	no	married	3	74		male	illiterate	5.5	2	no	no	no	medium	1	0.25	3	no	1						0.2		1.3				2.2					2000
mekana	adopter	2	0	three times a month	no	2	3.679	45	4	yes	no	25	no	married	3	75		male	illiterate	5	5	no	no	no	high	1	0.25	10	no	2						0.2					1.1	2.2		3			2800
mekana	adopter	1	0	twice a month	no	5	4.85488	60	2	yes	no	30	no	married	2	76		male	illiterate	5.75	6	no	no	no	medium	2	0.25	5	no	1					1	0.4		1.04			1.1	2.2	0.052	3			3000
Debir	adopter	1	0	four times a month	yes	6	7.05481	56	1	no	yes	20	yes	married	2	77		male	illiterate	7	2	yes	yes	no	very low	0.25	0.25	20	yes	1				0.75	1	0.2		0.91		0.7	3.3	1.1	0.078	1			2000		1
Debir	adopter	2	0	twice a month	yes	3	7.06101	40	2	yes	yes	25	no	married	4	78		male	illiterate	4.45	2	yes	yes	yes	very low		0.25	30	yes	2				0.75	1	0.4		0.65		0.7	3.3	1.1	0.078	1			2300		2
Debir	adopter	1	0	four times a month	yes	6	7.88358	56	3	no	no	10	no	married	2	79		male	read and write	10	3	no	yes	no	medium	1	0.5		no	1				1.5	2	0.2		0.78		1.4	3.3		0.091	2			900		1
Debir	adopter	2	0	twice a month	yes	6	7.67299	45	2	no	yes	30	no	married	4	80		male	illiterate	7.15	2	yes	yes	yes	medium	0.25	0.25	25	no	2				0.75	1	0.4		1.3	0.26	1.4	3.3	1.1	0.13	2			2000		2
Debir	non adopter	0	0	four times a month	yes	3	4.72335	40	1	no	yes	30	no	single	2	81		female	read and write	2.4	1	yes	yes	no	very low	0.25	0.25	25	yes	1				0.75		0.2				0.7	2.2	1.1	0.065				100
Debir	adopter	2	0	twice a month	yes	6	7.62999	55	1	yes	yes	20	no	married	4	82		male	illiterate	7.25	2	no	yes	yes	very low	0.25	0.25	30	no	2				0.75	1	0.2		1.3	0.26	1.4	3.3	1.1	0.13	1			2000		2
Debir	adopter	2	0	once a month	yes	2	9.33781	40	1	no	yes	15	no	married	4	83		male	illiterate	5.25	2	yes	yes	yes	low	0.25	0.25	10	no	2				0.75	2	0.4		0.91		1.4	3.3	1.1	0.078	2	1		2000		2
Debir	adopter	1	0	twice a month	yes	2	1.6532	32	1	no	yes	40	no	married	2	84		female	read and write	3.95	1	yes	yes	yes	very low	0.25	0.25	30	no	1				0.75	1	0.2		0.39									1000		1
Debir	adopter	1	0	once a month	yes	6	5.605	52	2	no	yes	30	no	married	6	85		female	illiterate	6.25	2	yes	yes	no	very low	0.25	0.25	40	no	1				1.5	1	0.4				1.4	2.2						2000		60
Debir	adopter	1	0	twice a month	yes	3	8.57091	75	2	no	yes	20	no	married	3	86		male	illiterate	10.5	3	yes	yes	yes	very low	0.25	0.25	25	no	1				0.75	2	0.4		0.78		1.4	3.3	1.1	0.078	2			2000		1
Debir	adopter	1	0	twice a month	yes	2	7.5269	45	0.25	no	yes	20	no	married	2	87		female	illiterate	5.25	1	yes	yes	yes	low	0.25	0.25	30	no	1				0.75	1	0.2		0.78		1.4	3.3	1.1		1			1500		1
Debir	adopter	2	0	once a month	yes	3	9.28319	60	2	yes	yes	30	no	married	4	88		male	illiterate	6.5	2	yes	yes	no	very low	0.25	0.25	30	no	3				1.5	2	0.4		1.95		1.4	3.3	1.1	0.13	1			2000		2
Debir	adopter	1	0	others	yes	3	3.05191	60	2	no	yes	30	no	widowed	2	89		female	read and write	4.25	2	yes	yes	no	low	0.25	0.25		yes	1						0.2		0.78		0.7	2.2		0.039				1000		1
Debir	adopter	1	0	twice a month	yes	1	6.42239	60	1	yes	yes	30	no	married	2	90		male	illiterate	5.3	1	yes	yes	yes	very low	0.25		30	yes	1					1	0.2		0.39		0.7	3.3	1.1	0.13				1800		2
sanja	non adopter	0	2	others	no	10	4.3807	22	2	yes	no	5	no	married	2	91		male	above	1.2	10	no	no	no	high			6	no	2				3	2	0.4			0.39								1500
Debir	adopter	1	0	twice a month	yes	1	7.96841	70	3	yes	yes	40	no	married	3	92		male	read and write	7	3	yes	no	yes	very low	0.25	0.25	20	yes	1					2	0.2		0.78		1.4	3.3	1.1	0.078	2			1500		1
Debir	adopter	1	0	once a month	yes	2	3.02351	32	1	no	yes	30	no	single	2	93		male	above	2	1	yes	yes	no	very low	0.25	0.25	40	no	1				0.75		0.2					2.2		0.078				800		2
Debir	adopter	1	0	others	yes	3	6.32125	60	1	no	yes	30	no	married	2	94		male	illiterate	6.25	2	yes	no	no	medium	0.25	0.25	20	no	1				0.75	1	0.2		0.78		1.4	2.2	1.1	0.104	2			1500		1
kanta tikim	adopter	2	0	twice a month	no	40	6.15663	68	5	no	no	60	no	married	4	95		male	illiterate	7.15	7	no	no	no	very low	1	1		no	2				0.75	2	0.2		1.17		1.4	2.2		0.156				1000
sanja	non adopter	0	3	others	no	40	1.7501	60	2	yes	no	3	no	married	4	96		male	above	5.5	2.5	no	no	no	medium		1	5	no	6				0.75	1	0.6			0.52								1050
sanja	non adopter	0	8	others	no	1	4.9375	40	12	yes	yes	30	yes	married	5	97		male	above	3.1	15	no	no	no	very low	1	0.25	20	no	8				2.25	2	1.2		1.3	0.7						1		2000
sanja	non adopter	0	6	twice a month	no	10	5.24	45	10	yes	no	10	no	married	5	98		male	illiterate	1.9	15	no	no	no	very high	3	0.5	5	no	6				3	2	1.2									1		1500
kenrebu	non adopter	0	4	others	no	15	3.0845	40	2	no	no	10	yes	married	3	99		female	above	3.1	2	no	no	no	high				no	4					3				0.65								2000
Debir	adopter	2	0	three times a month	yes	4	5.27419	50	2	no	yes	20	no	married	4	100		male	illiterate	3.75	2	no	yes	yes	low	0.25	0.25	40	no	2				0.75	1	0.4					3.3		0.13				800		4
kenbew	non adopter	0	4	twice a month	no	30	5.35	50	2.5	no	no	16	no	married	2	101	kes brhanie	male	illiterate	5	3	no	no	no	high	0.5	0.5	4	yes	4				2	2	2	1			1							1900
kenbew	non adopter	0	5	others	no	25	12.65	48	2	yes	no	10	no	married	5	102	menus abebe	male	read and write	5	2.5	no	no	no	medium	0.5		50	yes	5				2	2	5	3		40	1							1500
kenbew	non adopter	0	5	others	no	10	16.94	32	2	yes	yes	30	no	married	1	103	nurusen legese	male	above	3	2.5	no	no	no	medium	0.5	0.5	40	yes	5				4	2	3	4		50	1			30		1		2000
kenbew	non adopter	0	5	others	no	20	8.25	40	2	no	no	30	no	married	5	104	kebkab kebede	male	read and write	5	2.5	no	no	no	medium	0.5		3	yes	5				5	2	5	1								1		1500
kenbew	non adopter	0	10	others	no	30	15.75	55	3	no	yes	15	no	married	10	105	gebyaw tadese	male	illiterate	6	4	no	no	no	low	0.5	0.5	15	no	10				8	4	10	5										2500
kenbew	non adopter	0	5	others	no	10	11.05	40	1	no	no	15	no	married	8	106	habtu sefefe	male	read and write	4	2	no	no	no	high	0.5	0.5	2	yes	8				5	2	8	3			1					1		1500
kenbew	non adopter	0	6	others	no	30	9.7	50	2	no	no	20	no	married	6	107	dlie meshesha	male	illiterate	6	2.5	no	no	no	low	0.5		40	no	6				3	2	6	2		10	1					1		1500
kenbew	non adopter	0	10	others	no	10	14.2	38	2	no	no	20	no	married	10	108	zafie melaku	male	read and write	3	2.5	no	no	no	medium	0.5		2	yes	10				6	4	10	3			1					1		1000
kenbew	non adopter	0	10	others	no	30	13.2	55	2	no	yes	15	no	widowed	10	109	cheklu kebede	male	illiterate	8	2.5	no	no	no	medium	0.5		4	yes	10				5	3	10	4			1					1		2500
kenbew	non adopter	0	6	others	no	10	6.95	45	1	yes	no	40	no	married	3	110	alefe worku	male	illiterate	7	1.5	no	no	no	high	0.5		20	yes	6					3	5	2			1					1		2500
kenbew	non adopter	0	8	others	no	30	13.2	50	2.5	no	no	10	no	married	5	111	moges muche	male	illiterate	5	3	no	no	no	high	0.5		7	no	8				3	4	6	3		10	1					2		1500
kenbew	non adopter	0	6	others	no	10	6	55	2	no	no	25	no	married	4	112	muhammed ali	male	illiterate	7	2	no	no	no	very high			3	no	6				3	2	5	1										2000
kenbew	non adopter	0	4	others	no	17	6.74	33	1	yes	no	5	no	married	4	113	woreket ngusie	male	read and write	4	1.5	no	no	yes	high	0.5		5	no	4					2	3	3		3						2		2000
kenbew	non adopter	0	3	once a month	no	25	6.35	50	2	no	no	4	no	married	3	114	abebe melsew	male	illiterate	7	2	no	no	yes	high			30	no	3					2	3	4								1		2500
kenbew	adopter	3	1	three times a month	yes	10	3.55	40	2	yes	yes	10	no	married	10	115	sisay mekurya	male	read and write	5	2	no	no	no	medium			5	no	4	1			2		3	1			1							2500	10
a/ yoryanos	adopter	7	0	four times a month	yes	12	7.2	65	2	yes	yes	20	no	widowed	20	116	etenat yazew	female	read and write	7	2.5	no	yes	yes	very low	0.5			no	5	1			2	5					1							5000	20
a/ yoryanos	non adopter	0	2	others	yes	3	1.963	28	1	no	yes	5	no	married	4	117	goshye abohay	male	read and write	5	1	no	no	no	low			5	no	1				1	1	1							1				3000
1	adopter	1	1	others	no	1	0.2	25	0.5	no	yes	10	no	married	1	118	lmlemu chomaw	male	read and write	2	0.5	no	no	no	very low			5	no	1	1					1											25000
a/ yoryanos	adopter	1	0	others	no	20	1.496	50	2	no	no	15	no	divorced	6	119	kasaye yimer	female	read and write	4	2	no	no	no	13			2	no	1	1			1		1		4					2				3000	1
a/ yoryanos	adopter	1	0	others	yes	2	1.275	30	1	no	yes	15	no	married	6	120	lakech yambelie	female	read and write	5	1	no	no	no	very low			3	yes	1	1			1		1		2					5				5000	6
a/ yoryanos	adopter	3	0	once a month	yes	10	5.9	45	1.5	yes	yes	20	no	married	10	121	aderajew mekurya	male	read and write	7	2	yes	yes	yes	very low	0.5		5	yes	4	1			2	2	3				1	1						6000	10
a/ yoryanos	adopter	2	0	once a month	no	6	2.85	35	1	no	no	10	no	married	6	122	gashaw mekuryaw	male	read and write	6	1	no	yes	no	very low			3	no	2	1			1	1	2				1							2000	10
a/ yoryanos	adopter	2	0	once a month	no	20	3.15	50	1	yes	yes	10	no	married	8	123	ayesew bere	male	illiterate	4	1.5	no	no	no	medium	0.25	0.25	8	no	2	1			1	2	2											5000	8
a/ yoryanos	adopter	1	0	once a month	no	10	1.75	42	1	no	yes	5	no	married	4	124	sisay takele	male	illiterate	8	1	no	no	no	low			10	no	1	1				1		1										3600	4
a/ yoryanos	adopter	2	0	once a month	no	15	10.05	40	1	no	no	20	no	married	6	125	tenaw asfaw	male	illiterate	7	1.5	no	yes	no	low	0.5		15	no	3	1			1	2	1		10		2	3	1					3000	6
a/ yoryanos	non adopter	0	1	once a month	no	7	0.2	45	2	no	yes	7	yes	widowed	3	126	tiruye getahun	female	read and write	3	2	no	no	no	very low			3	no	1						1											2000
a/ yoryanos	non adopter	0	1	once a month	no	30	5.7	65	1	no	no	20	no	married	4	127	mesfin nebbyaw	male	read and write	5	1	no	no	no	low			5	no	1				1	2	1	1	10		1							1500
a/ yoryanos	non adopter	0	1	once a month	no	6	1.2	27	0.5	no	no	20	yes	married	2	128	amlaku kasa	male	read and write	4	0.5	no	no	no	medium			10	no	1					1	1											3000
a/ yoryanos	adopter	1	0	once a month	no	20	2.12	50	1	no	yes	5	no	married	4	129	agegnew dese	male	read and write	5	1	no	yes	no	low			5	no	1		1				1		4		2							5000		4
a/ yoryanos	adopter	1	0	twice a month	no	6	0.2	40	2	no	yes	10	no	married	6	130	abraham	male	read and write	8	2	no	no	no	very low			5	no	1	1					1											2500
a/ yoryanos	adopter	2	1	twice a month	no	7	0.4	46	2	no	yes	20	no	married	15	131	solomon	male	read and write	4	2	no	yes	no	low			3	no	3	2					2											2000	2
a/ yoryanos	adopter	2	0	three times a month	no	20	0	45	1	no	no	3	no	married	8	132	ayalew nebe	male	read and write	5	1	no	no	no	high			2	no	2	2																5000	8
sakdebrl	adopter	2	1	three times a month	no	20	4.35	52	2	no	no	45	no	married	4	133	teshome	male	read and write	8	2.5	no	no	no	low	0.5		5	yes	3	2			1	1	2					2						1500	4
sakdebrl	non adopter	0	1	three times a month	no	50	1.95	90	2	no	no	35	no	married	2	134	kasa bekele	male	illiterate	2	2	yes	no	yes	medium			30	no	2					1	1	1										1200
sakdebrl	adopter	1	0	four times a month	no	10	5	35	2	yes	yes	50	no	married	4	135	mihret adugna	male	read and write	4	2	yes	no	no	very low			10	no	1	1			1	2	1	1	10									700	4
sakdebrl	adopter	2	0	once a month	no	1	2	38	2	yes	yes	35	no	married	6	136	zenaw wob	male	read and write	6	3	no	no	no	very low	1		4	no	2	2				2												1000	6
sakdebrl	adopter	1	0	once a month	no	15	6.8	45	2	yes	no	11	no	married	3	137	nebere muche	male	read and write	7	2	yes	yes	yes	very low			30	no	1	1			1	2	1	1	10		1	1						1500	3
sakdebrl	adopter	2	0	twice a month	no	10	4.55	43	2	yes	no	45	yes	married	8	138	mershaw manegerew	male	illiterate	5	2.5	yes	no	yes	medium	0.5		50	no	2	2			1	2	2	1	5									2000	8
sakdebrl	adopter	2	0	twice a month	no	1	0	45	1	yes	no	45	no	married	6	139	mekonen mekuryaw	male	read and write	6	1	yes	no	no	very high			10	no	2	2																1500	6
sakdebrl	adopter	1	0	twice a month	no	10	6.098	40	1.5	no	yes	50	no	married	3	140	amare adugna	male	read and write	8	2	yes	no	no	very low	1		20	no	1	1			1	2	1	1	4		1	1		6				1000	3
sakdebrl	adopter	3	0	twice a month	yes	6	4.456	50	2	yes	yes	50	no	married	12	141	syum getaneh	male	read and write	5	2	yes	yes	no	very high			1	no	3		3				2	1				3			2			2000		12
sakdebrl	adopter	1	0	twice a month	no	30	2.226	35	0.5	no	no	20	no	married	4	142	kasaw tadese	male	illiterate	4	0.75	no	yes	no	medium	0.125		20	no	1					2	1							2				1000
sakdebrl	adopter	2	0	twice a month	no	15	4.312	38	1.5	yes	no	45	no	married	4	143	agche azanie	male	read and write	7	1.5	yes	yes	no	low			30	no	2		2		1	2	1		5		1				4			800		4
sakdebrl	adopter	2	1	once a month	yes	30	1.439	70	2	no	no	50	no	divorced	6	144	agegnew smegnew	male	illiterate	7	2	yes	no	yes	medium			10	no	3	2				1	2							3				2000	6
sakdebrl	adopter	1	0	three times a month	no	10	2.47	35	1	yes	yes	11	no	married	6	145	bewket ezezew	male	read and write	6	1	yes	no	no	low			30	no	1	1			1	1	1		4									900	6
sakdebrl	adopter	1	0	three times a month	no	5	4.22	38	0.75	no	no	11	no	married	3	146	destaw negash	male	read and write	4	0.75	no	no	no	very low			10	no	1		1		1	2	1	1	4									1000		3
sakdebrl	adopter	1	0	three times a month	no	10	5.55	46	0.75	no	no	13	no	married	6	147	derso teshome	male	read and write	5	0.75	yes	yes	no	high				no	1	1			1	1			10		2	1						1500	6
sakdebrl	adopter	1	1	three times a month	no	6	5.395	70	2	yes	no	45	no	single	2	148	kes teshome abebe	male	read and write	3	2	no	no	no	medium			10	no	2	1			2	1	1	1	3	3		1		5				50	4
sakdebrl	adopter	1	0	three times a month	no	20	6.332	40	1.5	no	no	35	no	married	4	149	mulye kasaye	male	read and write	7	1.5	yes	no	no	medium			45	no	1				1	2	1	1	6		1	1		4				800
sakdebrl	non adopter	0	2	three times a month	no	20	3.639	50	0.5	no	no	35	no	married	4	150	musie samuel	male	illiterate	4	0.5	yes	yes	no	low			45	no	2				1	1		1				1		3				400
adeba	non adopter	0	1	others	no	5	1.96	35	2	no	no	2	no	married	1	151		male	illiterate	5	1.5	no	no	no	high			5	no	1	0	0	0	0	1	0	0	2	0	1	0	0	0	0	0	0	1200	0	0
Ayiba	adopter	1	1	others	no	30	4.5	60	2	no	yes	7	no	widowed	1	152	Anchinalu	female	illiterate	5	0.5	no	no	no	low			2	no	1			1	2	1	1	0	0	0	1	1	0	0	0	0	0	1800
Ayiba	non adopter	0	1	four times a month	no	10	0.95	55	2	no	yes	5	no	married	1	153	Gigu kefle	male	illiterate	5	0.5	no	no	no	low			10	no	1	0	0	0	1	0	1	0	0	0	0	0	0	0	0	0	0	1700
Ayiba	non adopter	0	1	three times a month	no	50	0.2	75	2	no	no	6	no	married	0	154	Mulu belay	male	read and write	5	4	no	yes	no	very low			5	no	1	0	0	0	0	0	1	0	0	0	0	0	0	0	0	0	0	2000	0	0
Ayiba	adopter	1	0	four times a month	no	20	3.79	45	1.5	no	yes	2	no	married	2	155	setu	female	read and write	8	1.5	no	no	yes	very low	0	0	4	no	1	0	1	0	2	1	1	0	0	3	1	0	0	0	0	0	0	2300		2
Ayiba	non adopter	0	1	others	no	6	3.16	32	2	no	yes	15	no	widowed	2	156	Fikradis	female	read and write	4	6	no	yes	yes	very low			20	no	1	0	0	0	0	2	1	0	2	0	1	0	0	0	0	0	0	1500	0	0
Ayiba	non adopter	0	1	others	no	5	0.2	44	2	no	yes	4	no	married	2	157	tegegn	male	read and write	2	2	no	no	yes	very low			2	no	1	0	0	0			1											1500
Ayiba	non adopter	0	1	others	no	1	0.2	60	2	no	no	10	no	married	2	158	kibret	male	read and write	6	1.5	no	no	yes	very low			2	no	1						1											1700
Ayiba	non adopter	0	2	once a month	no	5	13.9	40	4	no	yes	20	no	married	5	159	kefale	male	illiterate	6	4	no	no	yes	low			30	no	2				1	1	2	1					10					2000
Ayiba	non adopter	0	2	four times a month	no	25	5.365	40	1.5	no	no	13	no	married	4	160	chalie	male	illiterate	8	2	no	no	yes	very low	0.5		5	no	2				2	2	2				2			5				4000
Ayiba	non adopter	0	1	others	no	10	3.028	35	2	no	no	9	no	married	3	161	takele	male	illiterate	5	1	no	no	yes	very low			40	no	1				1	2	1							6				3100
Ayiba	non adopter	0	1	others	no	40	3.7	60	2	no	no	20	no	married	2	162	kefale	male	read and write	3	12	no	no	yes	low			15	no	1				2	2	1											3300
Ayiba	non adopter	0	1	others	no	12	2.725	52	2	no	no	30	no	widowed	2	163	huluager	female	illiterate	5	1.5	no	no	yes	very low			6	no	1				2		1		2		1			5				1800
ayiba	non adopter	0	1	others	no	30	5.411	40	2	no	no	10	no	married	4	164	eyayu	male	read and write	4	1	no	no	no	low			1	no	1					2			4		4			7				2300
ayiba	non adopter	0	2	others	no	20	3.213	41	2	no	yes	5	no	married	5	165	gashaw	male	read and write	7	2	no	yes	yes	low			5	no	2				1		1	3						1				3200
ayiba	non adopter	0	1	others	yes	4	4.15	30	2	no	yes	3	no	married	6	166	bitweded	male	read and write	5	2	yes	yes	no	low			3	yes	1				1	1	1	2			1							3000
ayiba	adopter	1	0	others	no	20	3.65	56	2	no	yes	5	no	married	6	167	ayito	male	read and write	5	2.5	yes	yes	no	medium			10	no	1					2	1	1			1							2300	6
ayiba	adopter	1	0	others	no	10	3.96	35	2	no	yes	5	no	married	7	168	yeshambel	male	illiterate	3	1.5	no	yes	no	very low			20	yes	1	1			2	2	1		1					10				2800	7
Ayiba	adopter	1	0	others	no	1	0.265	35	2	no	no	30	no	married	6	169	dessie	male	illiterate	5	2.5	no	no	no	very low			1	no	1	1					1							5				2500	6
2	adopter	4	1	twice a month	yes	2	6.168	60	2	yes	no	5	no	married	22	170	genetu	male	illiterate	7	2	no	no	no	very low			2	no	5				1	5	2								6			10000		9
2	adopter	1	2	others	no	4	5.3	50	2	yes	no	30	no	married	4	171	chanyalew	male	illiterate	9	2	no	yes	no	very high			10	no	2				2	2	2				2							1200
3	non adopter	0	1	three times a month	no	1	3.015	36	2	yes	yes	40	no	married	3	172	maru	male	read and write	6	1	no	no	no	low			30	no	1					2	1	1						5				700
2	non adopter	0	2	others	no	2	1.7	60	2	no	no	5	no	divorced	2	173	yalganesh	female	illiterate	8	2	no	no	no	high			10	no	1				1		1	1										500
3	adopter	1	0	others	no	2	2.7	35	2	yes	no	30	no	married	3	174	tefera	male	illiterate	5	1	no	no	no	medium		0.5	10	yes	1				1	1	1	1										900		3
2	adopter	1	1	twice a month	yes	1	3.2	32	2	no	yes	40	no	single	3	175	maru	male	illiterate	4	2	no	no	no	medium			2	no	2				2		1	2										700		2
4	non adopter	0	1	others	no	1	1.999	28	2	no	no	30	no	married	2	176	tiruye	female	illiterate	2	0.5	no	no	no	medium			20	no	1				1		1	1	2					3				500
2	non adopter	0	2	others	no	4	0.95	45	2	yes	no	30	no	married	4	177	hareg	female	illiterate	6	2	no	no	no	medium			10	yes	2				1		1											1000
4	adopter	3	1	twice a month	no	2	3.336	32	15	no	no	20	no	married	5	178	abibo	male	above	4	1.5	no	no	no	low			5	no	4	3				2	2			7				2				800	2
3	adopter	1	0	three times a month	no	8	2.441	38	2	no	no	40	no	married	4	179	kesis nigerew	male	read and write	8	2	no	yes	no	low			15	yes	1	1					1	1			2			7				1200	4
4	adopter	1	1	four times a month	no	1	0	30	2	no	no	30	no	married	2	180	tsegaye	male	above	3	0.5	no	no	no	high			20	no	5																	700		2
3	adopter	2	0	twice a month	yes	7	2.492	40	1	yes	no	12	no	married	6	181	mare	female	read and write	4	3	no	no	no	high	1	1	2	yes	1	2			1	1					1			3	1			1000	6
janga	adopter	1	1	twice a month	no	30	4.136	50	3	no	no	27	no	married	2	182	mola	male	illiterate	8	3.5	no	no	no	high	0.5		20	no	2		1		1	2	2		2		1			2				2500		1
janga	non adopter	0	2	twice a month	no	25	3.21	60	2	no	no	23	no	married	2	183	abebe	male	illiterate	7	6	no	no	no	high			20	no	1					2	1	1	2									1200
2	adopter	3	1	twice a month	yes	3	2.35	30	2	yes	no	10	no	single	14	184	mulaw	male	illiterate	2	15	yes	yes	yes	high	3	10	1	yes	4		3		1	1	3											2000		11
4	non adopter	0	2	once a month	no	1	4.615	35	2	no	yes	30	no	widowed	4	185	abebe	male	read and write	1	0.5	yes	no	no	high			10	no	2				1	2	2				2			5				700
janga	non adopter	0	1	once a month	no	5	4.207	33	2	no	no	50	no	divorced	1	186	geremew	male	illiterate	5	4	no	no	no	high				no	1				1	1	1	1			2			8	1			1500
3	adopter	2	1	once a month	no	4	3.384	55	4	no	no	30	no	married	4	187	tarko	male	illiterate	4	6	yes	no	no	high	1.5	0.5	10	no	2		2		1		2	1			2			6	2			5000		4
Ayinba	adopter	1	0	others	no	10	0.815	35	2	no	yes	10	no	single	3	188	kesis yigzaw	male	read and write	4	1	no	no	no	low			15	no	1				1									5				1500		3
Ayinba	non adopter	0	1	once a month	no	22	0.278	70	2	yes	no	8	no	married	2	189	worku	male	illiterate	9	2	yes	no	no	high			3	no	1						1							6				2000
Ayinba	adopter	1	0	others	no	4	0	40	2	no	yes	25	no	married	4	190	tatek	male	read and write	6	2	no	no	no	very low			10	no	1	1																2000	4
janga	non adopter	0	1	once a month	no	10	4.1	35	2	no	no	50	no	married	2	191	gashaw	male	illiterate	6	4.5	no	no	no	low			20	no	1					1	1	2			2							1300
4	non adopter	0	3	twice a month	yes	7	4.526	48	5	yes	no	10	no	married	4	192	Yelibe	male	read and write	9	5	no	no	yes	high			10	yes	3				1	1	3	1			2			2				2000
janga	non adopter	0	2	once a month	no	15	3.932	60	4	no	no	40	no	single	2	193	Emuhay	male	illiterate	13	6	no	no	no	high			40	no	2				2	2	2							2	2			3000
4	adopter	1	1	twice a month	no	8	1.9	32	2	yes	yes	10	no	married	4	194	Alebie	male	read and write	6	1	no	yes	no	high			5	no	2		1		1		2	1										1000		2
janga	non adopter	0	2	once a month	no	3	2.41	35	2	no	no	50	no	married	2	195	kurie	male	illiterate	7	2.5	no	no	no	high			15	no	2				1	1	2		2									1000
3	adopter	1	0	once a month	no	6	2.7	58	3	no	no	20	no	single	2	196	tubiew	female	read and write	8	6	no	no	no	very low		1	15	no	1		1		2	1	1											12000		2
2	adopter	1	0	others	no	6	4.95	40	2	no	yes	60	no	married	4	197	mantegbosh	male	illiterate	9	1	no	yes	no	very low			20	no	1	1			1	4	1											2000	4
3	adopter	3	0	twice a month	yes	10	3.776	50	2	no	yes	20	no	married	8	198	Mandefro	male	read and write	9	3	no	no	no	low				no	3	3			1	3								2				1500	8
janga	non adopter	0	1	once a month	no	15	3.83	45	2	no	no	20	no	married	2	199	misganaw	male	read and write	8	6	no	no	no	high				no	1				2	2	1		1									1500
3	adopter	4	2	once a month	no	0.5	3.476	28	2	yes	no	30	no	single	8	200	Abay	male	above	2	2	no	no	no	low			20	no	6		4		3		6							2				2000		6
3	adopter	1	0	others	no	2	1.7	33	2	no	no	10	no	single	2	201	Aster	female	illiterate	6	5	no	no	no	low			6	no	1		1		1		1	1										1000		2
2	adopter	1	0	twice a month	no	15	2.017	60	2	no	yes	10	no	married	3	202	Marelgn	male	read and write	14	2	no	no	no	very low			10	no	1		1				2	2						9				800		3
3	adopter	1	0	four times a month	no	2	2.778	36	2	yes	no	5	no	married	3	203	tilksew	male	illiterate	4	0.5	yes	yes	no	very low				no	1		1		2	1	1							6				300		3
2	adopter	1	1	others	no	3	1.15	42	2	no	no	15	no	married	4	204	Enana	female	illiterate	5	2	no	no	no	very low				no	2	1			1		2											1000	3
2	adopter	3	2	others	no	5	1.35	38	2	no	no	20	no	married	6	205	Marie	female	illiterate	5	2	no	no	no	very low	1		20	no	3	1			1		3											4000
3	adopter	1	0	twice a month	no	10	3.7	50	2.5	no	no	20	no	married	3	206	Abuhay	male	read and write	29	4	no	no	yes	low			10	no	1	1			2	2	1											2000
2	non adopter	0	2	twice a month	no	10	5.3	54	2	yes	no	30	no	married	3	207	Chanyalew	male	read and write	6	2	no	no	no	very low	1		6	no	2				2	2	2				2							2000
3	adopter	1	0	twice a month	no	7	1.2	41	2	no	no	6	no	married	4	208	Kagnew	male	illiterate	7	4	no	yes	no	very low	0.5	1.5	3	no	1		2			1	1											1000		4
3	adopter	1	0	twice a month	no	7	4.439	37	1	no	no	10	no	married	2	209	Terefe	male	illiterate	5	1	no	yes	no	low				no	1	1			2	2	1				1			3				1000	2
Janga	adopter	1	1	three times a month	no	6	3.939	45	2	no	no	30	no	married	1	210	Melkie	male	read and write	7	1.5	no	no	no	low			15	no	1				1	2	1		2		1			2	1			1000
Janga	adopter	2	0	twice a month	no	17	3.743	45	2	yes	no	30	no	married	2	211	gebrie	male	illiterate	6	0.5	yes	no	no	high				no	2		2		2	1	2	1						6	5			1900		2
Janga	non adopter	0	1	others	no	8	3.7	40	1	no	no	40	no	married	1	212	Dersu	male	illiterate	10	4	no	no	no	medium				no	1				1	2	1	1										1000
Janga	non adopter	0	2	twice a month	no	3	3.876	37	1.5	no	no	40	no	married	2	213	Adissie	male	read and write	6	3	no	no	no	very low			20	no	2					2	2	1			1			2				600
3	non adopter	0	2	twice a month	no	4	1.241	33	2	no	no	6	no	married	2	214	Alemtsehay	female	illiterate	7	200	no	no	no	very low		2		yes	2				1		2							7				1000
3	adopter	2	0	twice a month	no	5	3.15	32	1.5	no	no	12	no	married	4	215	Shumet	male	read and write	7	4	no	no	no	high				no	2		2		1	2	2											1500
3	adopter	1	0	twice a month	yes	2	3.7	27	2	yes	no	50	no	married	2	216	Mero	male	read and write	5	2	no	no	no	high			30	no	1	1			2	2	1											1000	2
3	adopter	1	1	twice a month	no	6	3.965	37	2	no	no	6	no	married	3	217	Rigb	male	read and write	6	2	no	no	no	medium			2	yes	2		1		2	2	2							5				3000		2
Gebebesilj	adopter	1	0	others	yes	2	2.252	60	7.5	yes	yes	35	no	single	4	218	Asnakew	male	read and write	5	12	no	no	yes	medium	0.5	4	10	yes	1	1				2	1							4				2700	4
Gebebesilj	adopter	1	1	others	yes	12	7.32	45	3	yes	no	35	no	single	4	219	Adugna	male	illiterate	6	13.5	no	no	yes	low	0.5	10	10	yes	2	1				2	2	2	4		2					2		2500	2
Gebebesilj	non adopter	0	1	twice a month	no	20	2.239	45	1.5	no	no	35	no	married	6	220	Alemu	male	illiterate	6	6	no	no	no	low	0.5	4	15	no	1					2	1							3				3000
Chilo	adopter	5	2	twice a month	no	25	2.734	50	2	yes	no	30	no	married	5	221	Abiye	male	above	7	3	no	no	no	high			10	no	3	3	2			2	2							25	3			3500	3	2
gebebesilj	adopter	1	1	twice a month	no	6	5.465	38	2	no	yes	8	yes	single	2	222	simachew	male	read and write	7	4	no	no	no	very low		2	3	no	2				2	2	2	2						5				3000		1
salja	adopter	1	1	twice a month	no	10	4.509	35	2	no	no	30	no	married	2	223	amsal	male	read and write	8	4.5	no	no	no	low			15	no	2					2	2				3				3			1500	1.5
salja	adopter	1	2	twice a month	no	2	0.4	30	2	no	no	20	yes	married	2	224	Chekole	male	illiterate	4	2	no	yes	no	very low			2	no	2						2											1500
gembebdembesgie	adopter	1	1	twice a month	no	10	3.65	35	4	no	no	20	no	married	4	225	Adino	male	illiterate	7	4	no	no	no	very low			15	yes	2	1			1	1	2									2		1700	2
gebebdmbesgie	adopter	2	0	others	no	13	4.666	32	2	no	no	15	no	divorced	4	226	Babey	male	illiterate	3	1	no	no	no	very low	0.25		7	no	2		2		1	2	1	1	2		1				2			600		2
gebebsilj	non adopter	0	2	others	yes	15	6.36	68	5.5	yes	no	30	no	married	2	227	tefera	male	read and write	10	6	no	no	no	medium	0.5		10	no	2				2	3	1		2		2							3000
salja	non adopter	0	1	twice a month	no	50	1.75	78	2	no	no	15	no	married	2	228	tigabie	male	illiterate	7	3	no	no	no	high		2	20	no	1				1	1												1500
salja	adopter	2	0	twice a month	no	17	5.912	55	3.5	no	no	15	no	married	2	229	nega	male	read and write	6	4	no	no	no	very low	0.5		10	no	2	2			2	3	2		2		1			4				2000	1
Salja	adopter	1	2	others	no	2	4.782	45	2	yes	yes	25	no	married	2	230	Asfie	male	read and write	7	2	yes	yes	no	low			15	no	1				2	2	2			1	1			4				1600
Salja	non adopter	0	2	others	no	15	2.189	70	3	no	no	8	no	married	2	231	Ayelgn	male	illiterate	7	3.25	no	yes	no	high		0.25	20	no	2				1	1	2							3				1600
gebebesalij	adopter	2	3	twice a month	yes	3	1.176	38	2	yes	yes	2	no	widowed	5	232	Agerie	female	above	3	3	no	no	no	high		2	3	yes	2	2			1		2							2				1500	2
gebebssilj	adopter	2	2	twice a month	yes	4	4.67	45	4	yes	yes	40	no	married	3	233	workie	male	read and write	5	5	no	no	no	medium	0.5	1	20	yes	4	3	3		1	3	2		3					10				1800	2	2
saljigebebe	non adopter	0	2	others	no	10	8.292	52	2	yes	no	40	no	married	2	234	tarko	male	read and write	6	6.5	no	no	no	very low		2	30	no	2				1	4	1	2	3		2			4				1500
ebebesalij	non adopter	0	1	others	no	17	3.5	40	2	no	no	25	yes	married	1	235	Abebe	male	read and write	8	2	no	no	no	very low		2	3	no	1				2	2												1600
salijgebeba	non adopter	0	2	others	yes	30	4.639	45	1.5	no	no	2	no	married	2	236	Nigusie	male	read and write	6	3	no	yes	no	low		2	3	no	2				1	2	2	1			1			3				2000
salij	non adopter	0	0	twice a month	no	4	4.515	35	2	no	no	15	no	married	2	237	Gebrie	male	illiterate	6	2.5	no	no	no	medium		2	20	no	2				2	2	1	1						5				2000
gebebedembesgie	non adopter	0	2	twice a month	no	11	2.75	42	2	no	no	22	no	married	4	238	gezahegn	male	illiterate	6	1.5	no	yes	no	very low			12	no	2				1	2												1400
gebibasilja	adopter	1	0	others	yes	20	0.278	50	2	no	yes	20	no	widowed	2	239	Bizuayehu	male	illiterate	4	4	no	no	yes	very low		2	10	no	1		1				1							6				2100
Ayiba	adopter	1	0	others	yes	25	3.298	54	2	no	no	30	no	married	6	240	Zewudu	male	read and write	8	1	no	no	yes	very low			1	yes	1				2	1	1		4					6				2000		6
sankatikim	non adopter	0	2	others	no	50	6.139	70	7	no	no	40	no	married	4	241	Mola	male	illiterate	9	9	no	yes	no	low	1	1	60	no	2				1	2	1	1	9			1		13				1100
santakim	non adopter	0	2	others	no	30	6.644	60	5	no	no	50	no	married	3	242	Birara	male	illiterate	9	6	no	no	no	low	0.25	0.25		no	2				1	2	1	1	8		1	1		8				1200
sankatkim	non adopter	0	2	others	no	30	7.134	60	5	no	no	45	no	married	4	243	ayanaw	male	illiterate	6	6	no	no	no	medium	0.25	0.25		no	2				1	2	1	2	6		1	1		8				950
sankatkim	adopter	1	1	once a month	no	23	10.19	40	8	no	no	60	no	married	4	244	awoke	male	illiterate	8	9	no	no	no	medium	1	2	35	no	2	1			2	2	2	1	17	5	1	1		10		1		1000	2
sankatikim	adopter	2	1	twice a month	no	37	14.455	50	6	yes	no	60	no	married	4	245	mulat	male	read and write	7	8	yes	no	no	medium	0.5	2	40	no	2	1	1		2	2	2	2	25	7	2	1	2	15				1500	2	2
sankatikim	adopter	1	1	once a month	no	25	13.596	40	6	yes	no	60	no	married	4	246	choraw	male	illiterate	7	8	no	no	no	medium	2	2		no	2	1			2	2	2	2	25	3	1	1	1	12		2		1000	2	2
sankatkim	non adopter	0	0	others	no	30	7.479	60	7	no	no	31	no	married	4	247	agegnew	male	illiterate	5	8	no	no	no	low	0.25	0.25		no	2				1	2	1	1	17		2			13				900
sankatkim	non adopter	0	0	twice a month	no	30	8.306	48	7	no	no	50	no	married	4	248	yemataw	male	illiterate	5	8	no	no	no	medium	2	0.25	60	no	2				1	2	1	1	15		2	1		12				1200
salijgebebe	non adopter	0	1	others	yes	15	1.252	61	2.5	no	no	35	no	married	6	249	demas	male	read and write	6	3	no	no	no	medium	0.5	0.25	30	no	1					1	1							4				2500
kosoyeambaras	non adopter	0	2	once a month	no	20	4.064	45	1.5	yes	no	90	no	married	2	250	fentahun	male	read and write	3	2	no	no	no	high	0.5		6	no	2				1	1	1		7			1		8				1300
kosoye	non adopter	0	2	others	no	32	6.829	75	1.25	no	no	50	no	married	1	251	kasa bekele	male	illiterate	4	1.5	no	no	no	medium	0.25		6	no	2				1	1	3	1	3			3		3				1500
''	non adopter	0	2	once a month	yes	23	3.552	54	0.25	yes	no	100	no	married	2	252	ayelign mamo	male	illiterate	3	0.5	no	no	no	low	0.25		2	no	2				1	1			5			1		4				1200
'	adopter	1	2	three times a month	no	34	10.299	52	0.5	no	no	6	no	married	2	253	gdebew sisay	male	read and write	5	0.75	yes	no	no	medium	0.25			no	2				1	1	1		8		1		6		3			2000
''	adopter	1	1	once a month	yes	4	2.349	45	0.25	no	no	40	yes	married	2	254	tebje eshete	male	read and write	3	0.5	no	yes	no	medium	0.25		5	no	2				1		1		2			1		3				600
''	non adopter	0	1	twice a month	yes	40	8.538	65	0.75	no	yes	3	no	married	2	255	eshete	male	read and write	4	1	no	no	no	medium	0.25		10	no	2				2	2	2	1	7		1	2		6				500
''	adopter	1	1	twice a month	no	30	6.03	45	0.75	no	yes	6	no	married	2	256	adane zegeye	male	illiterate	3.25	1	no	no	no	high	0.25		6	no	2				1	1	2		7		1	2		4	6			2000
''	adopter	1	1	three times a month	yes	5	3.26	34	0.75	no	no	15	no	married	1	257	zegeye kasaw	male	above	4	1	no	no	no	high	0.25		5	no	2					1	1		2		1	1						1000
''	non adopter	0	2	three times a month	yes	34	4.155	54	0.25	yes	no	110	no	married	2	258	endeshaw kebede	male	illiterate	4	0.5	no	no	no	high	0.25	0.25	3	no	2				1	1	1		8			1		5				850
''	adopter	1	1	twice a month	yes	25	5.645	51	0.75	no	no	15	no	married	3	259	ayanaw gizachew	male	read and write	5	1	no	no	no	high	0.25		4	no	2				1	2	1	1	6			1		5				2000
''	adopter	1	1	twice a month	no	12	4.179	50	0.75	no	yes	10	no	married	2	260	akilew tefera	male	read and write	5	1	no	no	no	very high	0.25			no	2				1	1	1		3		1	1		3				1300
''	non adopter	0	2	twice a month	no	19	1.759	42	0.37	no	yes	10	no	married	1.5	261	melke asefa	male	illiterate	5	0.5	no	no	no	medium	0.13			no	2					1	1		4					3				1200
''	non adopter	0	1	others	yes	8	6.085	38	0.25	yes	yes	90	no	married	2	262	moges gebiw	male	read and write	3	0.5	no	no	no	high	0.25		4	no	1					1	1	1	9		1	2		5				1000
sanja	adopter	4	0	others	no	1	7.3	30	8	yes	no	20	no	married	3	263	getu molla	male	read and write	1.75	10	no	no	no	very high	0.5	1.5		no	4				2	2	4	3								1		2700
sanja	adopter	3	2	others	no	40	4.65	70	2	yes	no	15	no	divorced	5	264	alemu eshete	male	read and write	7.25	4	no	no	no	high	1	1	10	no	5				1	2	2	1								1		2000
''	non adopter	0	20	twice a month	no	10	34.2	33	10	no	yes	20	yes	single	12	265	habtamu ashebir	male	read and write	1	15	no	no	no	very high	3	1.5		yes	20				15	6	20	10		25	1					2		2000
''	non adopter	0	2	others	no	1	3.9	68	8	no	no	25	yes	married	2	266	abebaw kasse	male	illiterate	11.1	10	no	no	no	very high	1	0.5		no	2				1	2	2	1										2000
''	adopter	4	0	others	yes	7	8.16	37	8	no	no	2	yes	married	8	267	birle anagre	male	read and write	5	12	no	no	no	very high	2			no	5				3	2	4	2		6	1			10				2100
''	non adopter	0	4	others	yes	1	7.8	50	2	yes	yes	23	no	married	6	268	derjew yenewa	male	read and write	4.45	2	no	no	no	very low			5	no	4				2	4	4	1								1		2500
''	adopter	1	5	others	yes	2	11.9	50	9	yes	no	23	no	married	4	269	aregawi g/egizi	male	read and write	5	12	yes	no	no	very high	2	0.5	15	no	6				3	4	7	2		10	1					1		2500
''	non adopter	0	11	others	no	20	10.05	39	10	no	yes	5	no	married	6	270	sedeke malele	male	read and write	5	0	yes	no	no	low	0	0	3	no	11				4	4	8				1					1		2500
''	adopter	15	0	others	no	15	37.45	38	10	no	yes	10	no	married	15	271	birle ashebir	male	read and write	5	15	no	no	no	high	5		5	yes	15				20	4	15	8		50	1					3		4000
''	non adopter	0	8	others	no	20	21.8	38	10	yes	yes	10	no	married	5	272	amare jemere	male	above	4	15	no	yes	no	very low	4	1	6	no	8				6		8	12		40						2	6	3000
''	non adopter	0	2	once a month	no	6	15.752	43	15	yes	yes	10	yes	married	2	273	eyayeu abuhay	male	above	4.55	20	yes	no	yes	very high	5		4	no	2				7	2	2	8		5	2			4				2000
k/egizizbher	adopter	1	0	twice a month	no	7	6.114	60	11	yes	no	30	no	married	3	274	aynale azezew	female	illiterate	6.25	12	no	no	no	very high	1		30	yes	1	1			1	2	1	1	7		2			8				4000	3
''	adopter	1	0	once a month	yes	11	4.371	44	3.5	yes	no	20	no	married	4	275	misganaw baze	male	above	4.4	4	no	no	no	very high	0.5		2	yes	1	1			1	2	1		5		1			5	2			3500	4
''	adopter	1	0	once a month	no	9	5.542	44	3.5	yes	no	3	no	married	3	276	mola haile	male	read and write	3.3	4	no	no	yes	very high	0.5		1	yes	1		1		2	2	1		3		2			4				6000		3
''	adopter	0	2	twice a month	yes	10	7.216	42	4	no	no	15	no	married	6	277	endalik alemu	male	above	2.5	5.5	no	no	no	high	1.5		1	yes	1	2			2	2	3		13		2			2				3000	6
kereker	adopter	1	0	once a month	yes	2	2.352	29	2	yes	no	10	no	divorced	6	278	adhak ferya	female	illiterate	3.25	3	no	yes	yes	very high	1		10	no	1	1			1		1		4		1			14				600	6
''	adopter	3	0	once a month	yes	4	7.428	50	2	yes	yes	20	no	married	18	279	abebe teshome	male	read and write	4.65	8	no	yes	yes	very high		0.5	20	no	3	3				2	3		14	5	2			16		1		1000	6
''	adopter	2	0	once a month	no	2	8.828	42	8	yes	no	20	no	married	10	280	aweke mekonte	male	read and write	6.75	2	no	yes	yes	very high	6	2	20	no	2	2			3	2	2	1	14		2			16				1200	10
k/egizizbher	adopter	2	0	once a month	yes	8	3.698	45	5	yes	no	15	no	married	6	281	maru teshome	male	above	3.75	6	no	no	no	very high	1		4	yes	2		2			2	2		4		1			6				4000		6
''	adopter	1	0	once a month	no	10	4.118	49	6	yes	no	10	no	married	4	282	worku teshome	male	read and write	3.5	7	no	no	no	high	1		2	yes	1	1			1	2	1		3		1			6				5000	4
''	adopter	1	0	twice a month	yes	5	5.511	55	3.5	yes	no	30	no	married	4	283	belete alebachew	male	above	4.5	4	no	no	no	high	0.5		25	yes	1	1			1	2	1		3		3			5	2			6000	4
kereker	adopter	1	0	once a month	yes	2	8.663	38	4	yes	no	15	no	married	5	284	aweke tase	male	read and write	5.15	5	no	yes	yes	high	1	1	15	no	1	1			2	2	2	1	19		2			11				800	5
''	adopter	1	0	once a month	yes	2	3.041	38	3	yes	yes	2	no	married	7	285	habtu abibol	male	read and write	4.3	4	no	yes	yes	high	1	0.5	50	no	1	1			1	2	1							7				1000	7
k/egizizbher	adopter	1	0	twice a month	no	12	0.668	43	6	yes	yes	3	no	married	4	286	rufael chekol	male	above	4.1	8	no	no	no	high	2	2	1	yes	1	1					1		3					6				5000	4
''	adopter	2	0	once a month	no	12	5.954	74	9	yes	no	10	no	married	8	287	alemu ayele	male	illiterate	8.25	12	no	no	no	high	3		1	yes	2	2			1	2	2		10		2			8				6000	8
''	adopter	2	0	once a month	no	13	5.215	55	5	yes	no	20	no	married	9	288	negasi haile	male	above	6.3	8	yes	no	no	very high	3		3	yes	2	2				2	2	1	10		1			5				2000	9
kereker	adopter	3	0	once a month	yes	4	11.263	45	5	yes	yes	15	no	married	15	289	adane tasew	male	read and write	4.65	8	no	yes	yes	very high	3	0.2	15	no	3	3			7		3		16	7	2			21		1		2000	5
''	adopter	1	0	once a month	yes	3	6.222	40	3	no	yes	3	no	married	8	290	dessie zeene	male	read and write	4.85	5	no	yes	yes	very high	2	0.5	3	no	1	1			1	2	1		5	8	2			14				800	8
''	adopter	1	0	once a month	yes	2	7.571	46	4	yes	yes	15	no	married	7	291	kenaw chekol	male	read and write	5.25	5	no	yes	yes	very high	1	0.5	15	no	1	1			1	3	1		11		3			7				1000	7
''	adopter	1	0	once a month	yes	2	5.492	30	3	yes	yes	20	no	married	7	292	demoze teshome	male	read and write	4	4	no	yes	yes	very high	1	0.5	20	no	1	1			2	2	1		7		1			14				800	7
''	adopter	1	0	once a month	yes	2	0.304	32	2	yes	yes	4	no	married	4	293	getahun abibual	male	above	3.1	3	no	yes	yes	high	1	0.5	4	no	1	1					1							8				600
''	adopter	1	0	once a month	yes	3	6.183	40	2	yes	yes	3	no	married	6	294	dessie kinidu	male	read and write	5.25	5	no	yes	yes	very high	2	0.5	3	no	1	1			1	2	1		4	9	2			11				800	6
''	adopter	2	0	once a month	yes	5	1.269	62	5	no	yes	3	no	married	20	295	abibual dmisew	male	read and write	5.3	9	no	yes	yes	low	4	0.5	3	no	2	2					2				1			13				1200	20
[truncated: 199 more columns]

## Sheet: Sheet1
hhid	name	kebele	Adoptionstatus	breed_cow	age	sex	educ	marttial	famsz	land_size	land_farm	coop	trans	dairy_exp	offfarm	easy_input	mtraining	dis_mkt	mem_coop	inf_mkt	agreement	cow	vistiby_da	acc_credit	grazing	jersi	holisty	otherb	dairy_land	hefer	ox	calf	weyfen	sheep	goat	donkey	horse	muel	hen	bee	bull	others	TLU	mnt_cons	local_cow	milkper_day	milkjersi	milkholisti	milklocal
1	mikael molla	Shimara	non adopter	0	38	male	illiterate	married	6.25	3	2	yes	yes	6	no	yes	no	20	high	no	no	2	three times a month	no	1	0	0	0	1	2	0	1	0	0	0	1	0	0	0	0	0	0	2.4	3000	2	2	0	0	0
2	melisew welela	shimara	non adopter	0	57	male	illiterate	married	3.5	6	3	no	yes	17	no	no	no	30	high	no	no	2	others	no	3	0	0	0	3	4	2	2	1	0	0	1	0	0	7	2	0	0	6.947	1500	2	2	0	0	2
3	mekete Gebeye	Shimara	non adopter	0	65	male	above	married	3.75	3	2	no	no	40	no	no	no	30	high	no	no	1	others	no	1	0	0	0	1	1	0	1	1	0	0	1	0	0	3	0	0	0	2.439	1600	1	1
4	tigab aschenef	shimara	adopter	1	45	female	illiterate	widowed	4.15	3	2	no	no	15	no	no	no	30	very high	no	no	2	others	no	1	1	0	0	0.5	1	1	1	0	0	0	0	0	0	2	0	0	0	1.976	1400	1	2	1	0	1
5	sisay damtea	shimara	adopter	3	65	male	illiterate	married	1.75	4	2	yes	no	15	no	no	no	20	high	yes	no	3	three times a month	no	2	3	0	0	2	1	0	3	0	0	0	0	0	0	0	0	0	0	1.35	1000	0	3	3	0	0
6	azanaw shibabawu	shimara	adopter	2	60	male	illiterate	married	6.4	6	2	yes	no	20	no	yes	yes	30	very high	yes	yes	2	once a month	no	1	2	0	0	1	1	2	3	0	0	0	0	0	0	4	0	1	0	4.152	1500	0	12	12	0	0
7	kenaw shibabawu	shimara	adopter	1	62	male	read and write	married	5.4	6	3	yes	yes	40	no	yes	yes	30	very high	yes	no	1	once a month	no	2	0	0	0	2	2	1	1	0	0	0	1	0	0	2	0	0	0	3.426	3000	1	2	0	0	2
8	shimengewu tadege	shimara	non adopter	0	35	male	above	married	6.9	5	3	yes	yes	5	no	yes	no	30	high	yes	no	2	once a month	no	2	0	0	0	1	1	1	1	0	2	0	5	0	0	2	0	0	0	5.736	3000	1	1	0	0	1
9	birhan ketema	shimara	non adopter	0	66	male	read and write	married	5	6	3	no	no	30	yes	yes	no	30	very high	no	no	2	once a month	yes	1	0	0	0	2	1	1	2	0	0	5	0	0	0	20	0	0	0	3.06	1800	2	2	0	0	2
10	kassaw alem	shimara	non adopter	0	35	male	read and write	married	6	3	1	yes	no	15	no	yes	no	30	very high	yes	no	1	once a month	no	3	0	0	0	1	0	0	1	2	0	0	0	0	0	2	0	0	0	1.726	2000	1	2	0	0	2
11	tsega yehuala	shimara	non adopter	0	68	male	illiterate	married	4.85	8	4	yes	no	50	no	yes	yes	60	very low	yes	yes	2	once a month	no	2	0	0	0	2	1	2	1	1	0	1	1	1	0	2	2	0	0	5.662		2	6	0	0	6
12	banteyhun haylu	shimara	non adopter	0	65	male	read and write	married	3.75	62	2	no	yes	40	no	yes	yes	30	high	yes	yes	1	three times a month	no	2	0	0	0	2	2	2	0	0	0	0	1	0	0	3	0	0	0	4.239	1000	1	2	0	0	2
13	aragaw kebede	shimara	non adopter	0	72	male	illiterate	married	4.25	4	2	yes	yes	50	no	yes	yes	30	very high	yes	yes	2	once a month	no	1	0	0	0	1	1	1	2	1	1	0	1	0	0	2	0	0	0	3.756	1000	2	2	0	0	2
14	derbew gebeye	shimara	adopter	1	56	male	illiterate	married	5.5	4	1	yes	no	30	no	yes	no	30	very low	yes	no	1	once a month	no	1	0	1	2	1	2	2	1	1	0	1	0	0	0	4	1	0	0	4.635	800	0	0	0	2	0
15	alemadis mengstu	shimara	adopter	1	43	male	illiterate	married	7.95	4	2	yes	yes	14	no	yes	no	30	high	yes	no	3	once a month	no	1				1	3	2	3	2	0	2	1	0	0	2	0	0	0	7.336	1500	1	2	1
16	sisay assefa	shimara	non adopter	0	38	male	read and write	married	7.5	2	1	no	no	25	no	no	no	60	very high	no	no	1	others	no	1	0	0	0	1	1	1	0	0	0	1	0	0	0	2	0	0	0	1.906	2000	1	1	0	0	1
17	zemene alene	shimara	non adopter	0	65	male	illiterate	married	5.5	5	3	no	yes	40	no	yes	no	25	very high	no	no	3	once a month	no	2	0	0	0	2	2	0	3	0	0	0		0	0	3	1	0	0	2.142	2000	3	4	0	0	4
18	guadea abebe	shimara	adopter	1	45	male	read and write	married	6.65	3	1	no	yes	28	yes	yes	no	20	high	yes	no	1	once a month	no	1	0	1	0	1	1	2	1	1	1	5	4	1	0	0	3	0	0	8.389	2400	1	3	0	3
19	dereje teshome	shimara	adopter	1	40	male	read and write	married	7.5	6	3	no	no	25	no	yes	no	30	very high	yes	no	1	once a month	no	2	0	0	0	1	0	2	1	1	0	0	1	0	0	2	0	0	0	3.676	1000	1	1
20	kassaw mar	shimara	adopter	2	40	male	above	married	3.1	3	1	yes	yes	15	no	yes	yes	10	very high	yes	no	2	once a month	no	1	2	0	0	1	0	1	2	1	1	0	1	0	0	3	3	0	0	3.028	2000	0	12	12	0	0
21	gashaw mengstu	shimara	non adopter	0	45	male	read and write	married	6.4	4	2	yes	yes	25	yes	yes	yes	30	very high	yes	yes	1	once a month	no	2	0	0	0	1	1	2	1	1	0	2	2	0	0	3	2	0	0	5.405	500	1	2	0	0	2
22	asmamaw fula	shimara	non adopter	0	75	male	read and write	married	3.75	6	4	yes	yes	60	no	yes	yes	30	high	yes	yes	3	twice a month	no	2	0	0	0	1	3	1	2	0	0	0	1	0	0	5	3	0	0	4.424	1500	3	2
23	atanawu takele	shimara	non adopter	0	45	male	read and write	married	5.2	2	1	no	yes	20	yes	yes	no	30	very high	yes	no	1	once a month	no	1	0	0	0	1	1	1	1	0	0	0	0	0	0	1	0	0	0	1.963	1500	1	1	0	0	1
24	teshome	shimara	adopter	1	57	male	read and write	married	9.4	6	2	yes	yes	10	no	yes	no	60	very low	yes	no	1	once a month	no	1	1			1	2	2	1	1	0	1	1	0	0	4	0	0	0	5.332	1000	1	2
25	gashaw	shimara	adopter	2	46	male	read and write	married	6.95	3	1	yes	yes	4	no	yes	no	10	very high	yes	no	4	once a month	no	1		1		1	1	2	4	1	0	1	1	0	0	4	0	0	0	5.182	1000	1	2			1
26	abebe tebeje	santatikim	adopter	2	52	male	illiterate	married	8	5	4	no	no	38	no	yes	yes	50	medium	no	no	1	once a month	no	0.25	1			0.25	2	2	1	1	7	2	2	2	2	8	2	1	0	12.28	900	2	5	2		3
27	melak dessie	santatikim	adopter	1	50	male	illiterate	married	3.85	6	5	no	no	28	no	no	yes	50	low	no	no	2	four times a month	no	0.25	2			0.25	1	2	1	0	18	0	2	0	0	2	0	0	0	6.716	1000	2	4	2		4
28	sisay takele	santatikim	adopter	1	58	male	illiterate	married	3.85	5	4	no	no	32	no	no	no	50	medium	no	no	3	once a month	no		1			5	2	2	0	7	3	0	0	1	8	0	0	0	0	19.04	950	2	8	4		4
29	sito tilaye	santaatikim	adopter	2	40	male	illiterate	married	4.15	6	5	no	no	20	no	no	no	45	low	no	no	2	others	no	0.25	2			1.25	1	1	1	1	8	0	2	1	0	9	0	0	0	6.357	900		6	4		4
30	gilea gidey	santatikim	adopter	2	21	male	read and write	married	8.4	7	6	no	no	40	no	no	no	60	medium	no	no	2	others	no	1	2			1	1	2	1	1	3	0	2	1	0	4	0	0	0	6.642	1200		8	4		4
31	ayanaw andargea	santatikim	adopter	1	60	male	illiterate	married	5.95	6	5	no	no	40	no	no	no	23	low	no	no	2	once a month	no	1	1			1	2	2	2	2	2	3	1	1	1	1	5	0	1	8.978		1	3	2		1
32	aregaw getaneh	santatikim	adopter	11	67	male	read and write	single	9.75	4	3	yes	yes	35	yes	no	no	60	medium	no	no	5	once a month	no	0.25	2			2	2	2	3	4	30	4	3	2	1	12	0	3	0	19.326	2000	2	11	3	4	3
33	jenberu	santatikim	adopter	1	47	male	illiterate	married	4.15	6	5	no	no	28	yes	no	no	40	low	no	no	2	once a month	no	0.25	1			0.25	1	2	1	1	6	0	2	1	0	8	0	0	0	7.084	1000	2	6	2		4
34	G/meskel	santatikim	adopter	2	60	male	read and write	married	5.15	8	7	no	no	28	no	no	no	60	low	no	no	3	others	no	0.25	2			1	1	2	1	1	3	3	1	0	0	18	0	0	0	5.414	1100	1	6	2		4
35	marye	santatikim	adopter	1	43	male	illiterate	married	5.25	7	0.25	yes	yes	21	yes	no	no	2	low	no	no	3	others	no	0.25	1			1	1	2	1	1	7	1	1	1	1	16	0	6	0	12.348	900	1	3	2		1
36	ketema	kosoye anbaras	adopter	1	58	male	read and write	married	2.75	0.75	0.5	no	yes	30	no	no	no	100	very low	yes	no	2	twice a month	no	0.25		1		0.5	1	1	2	1	5	0	0	1	6	0	0	0	2	11.25	1600	1	2			1
37	tarekegni	kosoye ambaras	adopter	1	67	male	read and write	married	2.65	1.5	1	yes	yes	18	no	no	no		medium	no	no	1	once a month	no	0.5	1			0	0	1	1	0	7	0	1	1	0	7	0	0	0	4.001	1000	0	1
38	dubea	kosoye ambaras	adopter	1	65	male	read and write	married	3.4	1	0.75	no	no	40	yes	no	no	4	medium	yes	no	2	twice a month	no	0.25				0	1	1	1	0	7	0	1	1	0	4	0	0	0	4.712	1300	1	2			2
39	kess adisu	kossoye ambaras	non adopter	0	42	male	read and write	married	2.45	2	1.5	no	no	20	yes	no	no	15	low	no	yes	1	once a month	no	0.5				0	0	1	1	0	5	0	0	1	0	3	0	0	0	2.989	900	2	2			2
40	getalem	kossoye ambaras	non adopter	0	38	male	read and write	married	3.3	2	1.5	no	no	10	no	no	no	30	high	no	yes	1	twice a month	no	0.5				0	0	2	2	0	10	0	0	1	0	4	0	0	0	4.852	400	1	2			2
41		yekirar	adopter	1	55	male	illiterate	married	4.25	2	1.5	no	no	4	no	yes	no	60	high	yes	yes	1	twice a month	no	0.5		1		0.5	1	1	1	0	16	3	2	4	0	6	1	0	0	10.301	3000		5
42		yekirar	adopter	1	28	male	read and write	divorced	1.6	0.5	0.25	yes	no	2	yes	yes	no	35	very low	no	yes	1	twice a month	no	0.5		1		2	0	0	1	1	3	0	0	2	0	5	1	0	0	3.608	600		6		6
43		yekirar	adopter	2	57	male	illiterate	married	7.1	3	2.5	no	no	6	no	yes	no	30	low	yes	yes	2	twice a month	no	0.25		2		0.25	1	2	1	0	0	0	0	5	1	0	5	0	0	9.565	2700		8		8
44		yekirar	adopter	1	45	male	read and write	married	6.3	1	0.5	no	no	3	no	yes	no	45	low	yes	yes	2	twice a month	no	0.5		1		0.5	1	1	1	0	13	0	0	3	0	5	1	0	0	7.008	2723		6
45		yekirar	adopter	1	40	male	read and write	married	5.65	1.5	1	no	no	2	no	yes	no	35	low	yes	yes	1	twice a month	no	0.25		2		0.25	1	0	1	0	3	0	0	2	1	5	2	0	0	4.711	2500		6
46		yekirar	adopter	2	60	male	illiterate	widowed	3.75	1	0.5	no	no	5	no	yes	no	50	very low	yes	yes	1	twice a month	no	0.5	1	1		0.5	1	0	1	2	7	0	1	2	0	8	0	0	0	6.364	1800		15
47		yekirar	adopter	1	32	female	read and write	married	2.5	1	0.5	no	no	2	yes	yes	no	41	low	yes	yes	1	twice a month	no	0.5		1		0.5	0	1	1	1	6	0	0	3	0	6	1	0	0	6.111	850		4		1
48		yekirar	adopter	1	38	male	read and write	married	4.15	1.5	1	no	no	3	yes	yes	no	43	very low	yes	yes	1	twice a month	yes	0.5	1			0.5	1	1	1	0	7	0	0	2	2	4	2	0	0	7.318	1800		8	8
49		yekirar	adopter	1	40	male	read and write	married	4.85	2	0.5	no	no	5	yes	yes	no	30	very low	yes	no	1	twice a month	yes	0.5		1		0.25	1	0	1	1	10	0	0	3	0	3	0	0		6.339	790		3
50		yekirar	adopter	1	31	male	above	married	2.95	1	2	no	yes	2	yes	yes	no	30	very low	5	yes	1	twice a month	no			1			1	0	1	1	3	0	1	2	0	2	3	0	0	5.025		1	6
51		Yekrar woganba	non adopter	0	37	male	read and write	married	3.85	1	2	no	yes	3	yes	yes	no	40	very low	yes	yes	2	others	no	0.25				0.5	0.75	1	0.4		1.56		0.7	4.4	1.1					8.3853	2075		14
52		Yekrar woganba	non adopter	0	35	male	read and write	married	4.9	1	0.5	no	no	4	yes	yes	no	45	very low	yes	yes	2	others	no	0.5				0.5	0.75		0.2		7.13			3.3		0.065		1		5.91024	3000		9
53		Yekrar woganba	adopter	1	41	male	read and write	married	6.9	2	1.5	no	no	4	yes	yes	no	25	very low	yes	yes	1	others	no	0.25				0.25		1	0.2		1.17	0.15	0.7	4.4	1.1	0.13	5			7.76829	2000		4
54		Yekrar woganba	non adopter	0	45	male	read and write	married	3.95	1	0.5	no	no	3	yes	yes	no	45	very low	yes	yes	2	others	no	0.5				0.5	0.75		0.4		1.04		0.7	5.5	1.1	0.13	1			8.53239	1580		8
55		Yekrar woganba	non adopter	0	48	male	read and write	married	5.75	2	1.5	no	no	3	yes	yes	no	27	very low	yes	yes	1	others	no	0.5				0.25			0.2		1.82			5.5	1.1	0.065	4			7.54945	1950		5
56		Yekrar woganba	non adopter	0	42	male	read and write	married	4.15	1	0.5	no	no	2	yes	yes	no	50	very low	yes	yes	1	others	no	0.5				0.5	0.75	1	0.2		1.69		1.4	3.3		0.13	1			6.43689	1615		6
57		Yekrar woganba	adopter	2	39	male	above	married	5.7	2	0.5	no	no	5	no	yes	no	35	very low	yes	yes	2	others	no	0.5				0.5	0.75	1	0.4		1.82		1.4	3.3	1.1	0.091	3			7.70928	2500		8
58		Yekrar woganba	adopter	3	56	male	illiterate	married	6.9	3	2	no	no	5	no	yes	no	45	very low	yes	yes	3	others	yes	1.5				0.5	0.75	2	0.4		2.21		2.1	5.5	2.2		1			12.8728	3000		15
59		mekana	adopter	2	40	male	illiterate	married	4.5	4	3	no	no	3	no	no	no	40	very low	no	yes	2	once a month	no	1						1	0.2		0.65			1.1	2.2	0.039				4.75501	2600		4
60		mekana	adopter	1	28	male	illiterate	married	4.75	6	5	yes	no	3	no	no	no	50	very low	no	no	1	once a month	no	1				0.25					0.26			1.1						1.2438	1378		2
61		mekana	adopter	2	40	male	read and write	married	5.1	3	2	no	no	2	no	no	no	30	very low	no	no	2	once a month	no	1							0.2		0.26			2.2		0.052				2.49448	2000		4
62		mekana	adopter	2	50	male	read and write	married	7.25	4	3	yes	no	3	no	no	no	40	very low	no	no	2	twice a month	no	1						2	0.2		1.3	0.26		1.1		0.026				3.45314	2800		6
63		mekana	adopter	1	45	male	read and write	married	7.25	6	5	yes	no	2	no	no	no	20	very low	no	yes	1	twice a month	yes	1					0.75		0.2					3.3		0.039				4.23301	1880		3
64		mekana	adopter	2	60	female	illiterate	widowed	9	6	4	yes	no	7	no	no	no	40	very low	no	no	2	twice a month	no	2					0.75	2	0.2					2.2	0.013		1			5.0398	2500		4
65		mekana	non adopter	0	55	male	read and write	married	7.25	4	3	yes	no	6	no	no	yes	30	very low	no	no	2	twice a month	no	1					0.75				0.39			1.1	2.2					4.2432	1900		6
66		mekana	adopter	1	50	female	read and write	single	7.75	4	3	yes	no	2	no	no	no	30	medium	no	no	1	three times a month	no	1									1.3			1.1	1.1	0.091	4			2.60218	2160		3
67		mekana	adopter	3	40	male	read and write	married	2.5	3	2	yes	no	6	no	no	yes	60	high	no	no	3	once a month	no	1					0.75		0.2		1.17			2.2		0.26				3.17798	3000		9	3
68		mekana	adopter	1	57	female	read and write	married	3.75	4	2	yes	no	2	no	no	yes	30	very low	no	no	1	once a month	yes		1				1.5	1	0.2		1.3		0.7	1.1	3.3	0.091				7.66518	3000		2
69		mekana	non adopter	0	60	female	illiterate	single	6.75	2	1	yes	no	5	yes	no	yes	30	medium	no	yes	1	twice a month	no	0.25				0.25			0.2								1			0.043	2500		2		2
70		mekana	non adopter	0	45	male	read and write	married	1.4	3	2	yes	no	2	no	no	no	30	medium	no	no	2	twice a month	no	1				0.25			0.4		0.65				2.2					2.5845	1430		2
71		mekana	adopter	2	50	male	illiterate	married	6.25	3	1	yes	no	2	no	no	no	45	high	no	no	2	once a month	yes						1.5	1			0.78			3.3	1.1					7.0664	1560		2
72		mekana	adopter	1	35	male	read and write	married	1.75	3	2	yes	no	2	no	no	no	60	very high	no	no	1	twice a month	no	1				0.25	0.75		0.2					1.1		0.091				1.81368	1330		2
73		mekana	adopter	2	48	male	read and write	married	6.5	2	2	no	no	2	yes	no	no	30	medium	yes	no	2	twice a month	no					0.25	0.75		0.2		1.17			2.2	1.1	0.039				4.38511	2000		4
74		mekana	adopter	1	75	male	illiterate	married	5.5	2	1	yes	no	1	no	no	no	30	medium	no	no	1	three times a month	no	1				0.25			0.2		1.3				2.2					2.629	2000		3
75		mekana	adopter	2	45	male	illiterate	married	5	5	4	yes	no	2	no	no	no	25	high	no	no	2	three times a month	no	1				0.25			0.2					1.1	2.2		3			3.679	2800		3
76		mekana	adopter	1	60	male	illiterate	married	5.75	6	2	yes	no	5	no	no	no	30	medium	no	no	1	twice a month	no	2				0.25		1	0.4		1.04			1.1	2.2	0.052	3			4.85488	3000		2
77		Debir	adopter	1	56	male	illiterate	married	7	2	1	no	yes	6	yes	yes	no	20	very low	yes	yes	1	four times a month	yes	0.25				0.25	0.75	1	0.2		0.91		0.7	3.3	1.1	0.078	1			7.05481	2000		2		1
78		Debir	adopter	2	40	male	illiterate	married	4.45	2	2	yes	yes	3	yes	yes	yes	25	very low	yes	yes	2	twice a month	no					0.25	0.75	1	0.4		0.65		0.7	3.3	1.1	0.078	1			7.06101	2300		4		2
79		Debir	adopter	1	56	male	read and write	married	10	3	3	no	no	6	no	yes	no	10	medium	yes	no	1	four times a month	no	1				0.5	1.5	2	0.2		0.78		1.4	3.3		0.091	2			7.88358	900		2		1
80		Debir	adopter	2	45	male	illiterate	married	7.15	2	2	no	yes	6	yes	yes	yes	30	medium	yes	no	2	twice a month	no	0.25				0.25	0.75	1	0.4		1.3	0.26	1.4	3.3	1.1	0.13	2			7.67299	2000		4		2
81		Debir	non adopter	0	40	female	read and write	single	2.4	1	1	no	yes	3	yes	yes	no	30	very low	yes	yes	1	four times a month	no	0.25				0.25	0.75		0.2				0.7	2.2	1.1	0.065				4.72335	100		2
82		Debir	adopter	2	55	male	illiterate	married	7.25	2	1	yes	no	6	yes	yes	yes	20	very low	yes	no	2	twice a month	no	0.25				0.25	0.75	1	0.2		1.3	0.26	1.4	3.3	1.1	0.13	1			7.62999	2000		4		2
83		Debir	adopter	2	40	male	illiterate	married	5.25	2	1	no	yes	2	yes	yes	yes	15	low	yes	no	2	once a month	no	0.25				0.25	0.75	2	0.4		0.91		1.4	3.3	1.1	0.078	2	1		9.33781	2000		4		2
84		Debir	adopter	1	32	female	read and write	married	3.95	1	1	no	yes	2	yes	yes	yes	40	very low	yes	no	1	twice a month	no	0.25				0.25	0.75	1	0.2		0.39									1.6532	1000		2		1
85		Debir	adopter	1	52	female	illiterate	married	6.25	2	2	no	yes	6	yes	yes	no	30	very low	yes	no	1	once a month	no	0.25				0.25	1.5	1	0.4				1.4	2.2						5.605	2000		6		60
86		Debir	adopter	1	75	male	illiterate	married	10.5	3	2	no	yes	3	yes	yes	yes	20	very low	yes	no	1	twice a month	no	0.25				0.25	0.75	2	0.4		0.78		1.4	3.3	1.1	0.078	2			8.57091	2000		3		1
87		Debir	adopter	1	45	female	illiterate	married	5.25	1	0.25	no	yes	2	yes	yes	yes	20	low	yes	no	1	twice a month	no	0.25				0.25	0.75	1	0.2		0.78		1.4	3.3	1.1		1			7.5269	1500		2		1
88		Debir	adopter	2	60	male	illiterate	married	6.5	2	2	yes	yes	3	yes	yes	no	30	very low	yes	no	3	once a month	no	0.25				0.25	1.5	2	0.4		1.95		1.4	3.3	1.1	0.13	1			9.28319	2000		4		2
89		Debir	adopter	1	60	female	read and write	widowed	4.25	2	2	no	yes	3	yes	yes	no	30	low	yes	yes	1	others	no	0.25				0.25			0.2		0.78		0.7	2.2		0.039				3.05191	1000		2		1
90		Debir	adopter	1	60	male	illiterate	married	5.3	1	1	yes	yes	1	yes	yes	yes	30	very low	yes	yes	1	twice a month	no	0.25						1	0.2		0.39		0.7	3.3	1.1	0.13				6.42239	1800		2		2
91		sanja	non adopter	0	22	male	above	married	1.2	10	2	yes	no	10	no	no	no	5	high	no	no	2	others	no						3	2	0.4			0.39								4.3807	1500	2	2			1
92		Debir	adopter	1	70	male	read and write	married	7	3	3	yes	yes	1	yes	no	yes	40	very low	yes	yes	1	twice a month	no	0.25				0.25		2	0.2		0.78		1.4	3.3	1.1	0.078	2			7.96841	1500		3		1
93		Debir	adopter	1	32	male	above	single	2	1	1	no	yes	2	yes	yes	no	30	very low	yes	no	1	once a month	no	0.25				0.25	0.75		0.2					2.2		0.078				3.02351	800		2		2
94		Debir	adopter	1	60	male	illiterate	married	6.25	2	1	no	yes	3	yes	no	no	30	medium	yes	no	1	others	no	0.25				0.25	0.75	1	0.2		0.78		1.4	2.2	1.1	0.104	2			6.32125	1500		2		1
95		kanta tikim	adopter	2	68	male	illiterate	married	7.15	7	5	no	no	40	no	no	no	60	very low	no	no	2	twice a month	no	1				1	0.75	2	0.2		1.17		1.4	2.2		0.156				6.15663	1000		4			4
96		sanja	non adopter	0	60	male	above	married	5.5	2.5	2	yes	no	40	no	no	no	3	medium	no	no	6	others	no					1	0.75	1	0.6			0.52								1.7501	1050	3	4			1
97		sanja	non adopter	0	40	male	above	married	3.1	15	12	yes	no	1	yes	no	no	30	very low	no	no	8	others	yes	1				0.25	2.25	2	1.2		1.3	0.7						1		4.9375	2000	8	5
98		sanja	non adopter	0	45	male	illiterate	married	1.9	15	10	yes	no	10	no	no	no	10	very high	no	no	6	twice a month	no	3				0.5	3	2	1.2									1		5.24	1500	6	5			0.5
99		kenrebu	non adopter	0	40	female	above	married	3.1	2	2	no	no	15	no	no	no	10	high	no	no	4	others	yes							3				0.65								3.0845		4	3			2
100		Debir	adopter	2	50	male	illiterate	married	3.75	2	2	no	no	4	yes	yes	yes	20	low	yes	no	2	three times a month	no	0.25				0.25	0.75	1	0.4					3.3		0.13				5.27419	800		4		4
101	kes brhanie	kenbew	non adopter	0	50	male	illiterate	married	5	3	2.5	no	no	30	no	no	no	16	high	no	yes	4	twice a month	no	0.5				0.5	2	2	2	1			1							5.35		4	2			0.5
102	menus abebe	kenbew	non adopter	0	48	male	read and write	married	5	2.5	2	yes	no	25	no	no	no	10	medium	no	yes	5	others	no	0.5					2	2	5	3		40	1							12.65	1500	5	5			1
103	nurusen legese	kenbew	non adopter	0	32	male	above	married	3	2.5	2	yes	no	10	yes	no	no	30	medium	no	yes	5	others	no	0.5				0.5	4	2	3	4		50	1			30		1		16.94	2000	5	1			1
104	kebkab kebede	kenbew	non adopter	0	40	male	read and write	married	5	2.5	2	no	no	20	no	no	no	30	medium	no	yes	5	others	no	0.5					5	2	5	1								1		8.25	1500	5	5			1
105	gebyaw tadese	kenbew	non adopter	0	55	male	illiterate	married	6	4	3	no	no	30	yes	no	no	15	low	no	no	10	others	no	0.5				0.5	8	4	10	5										15.75	2500	10	10			1
106	habtu sefefe	kenbew	non adopter	0	40	male	read and write	married	4	2	1	no	no	10	no	no	no	15	high	no	yes	8	others	no	0.5				0.5	5	2	8	3			1					1		11.05	1500	5	8			1
107	dlie meshesha	kenbew	non adopter	0	50	male	illiterate	married	6	2.5	2	no	no	30	no	no	no	20	low	no	no	6	others	no	0.5					3	2	6	2		10	1					1		9.7	1500	6	6			1
108	zafie melaku	kenbew	non adopter	0	38	male	read and write	married	3	2.5	2	no	no	10	no	no	no	20	medium	no	yes	10	others	no	0.5					6	4	10	3			1					1		14.2	1000	10	10			1
109	cheklu kebede	kenbew	non adopter	0	55	male	illiterate	widowed	8	2.5	2	no	no	30	yes	no	no	15	medium	no	yes	10	others	no	0.5					5	3	10	4			1					1		13.2	2500	10	10			1
110	alefe worku	kenbew	non adopter	0	45	male	illiterate	married	7	1.5	1	yes	no	10	no	no	no	40	high	no	yes	6	others	no	0.5						3	5	2			1					1		6.95	2500	6	3			1
111	moges muche	kenbew	non adopter	0	50	male	illiterate	married	5	3	2.5	no	no	30	no	no	no	10	high	no	no	8	others	no	0.5					3	4	6	3		10	1					2		13.2	1500	8	5			1
112	muhammed ali	kenbew	non adopter	0	55	male	illiterate	married	7	2	2	no	no	10	no	no	no	25	very high	no	no	6	others	no						3	2	5	1										6	2000	6	4			1
113	woreket ngusie	kenbew	non adopter	0	33	male	read and write	married	4	1.5	1	yes	no	17	no	no	yes	5	high	no	no	4	others	no	0.5						2	3	3		3						2		6.74	2000	4	4			1
114	abebe melsew	kenbew	non adopter	0	50	male	illiterate	married	7	2	2	no	no	25	no	no	yes	4	high	no	no	3	once a month	no							2	3	4								1		6.35	2500	3	3			1
115	sisay mekurya	kenbew	adopter	3	40	male	read and write	married	5	2	2	yes	no	10	yes	no	no	10	medium	yes	no	4	three times a month	no		1				2		3	1			1							3.55	2500	1	10	10		1
116	etenat yazew	a/ yoryanos	adopter	7	65	female	read and write	widowed	7	2.5	2	yes	no	12	yes	yes	yes	20	very low	yes	no	5	four times a month	no	0.5	1				2	5					1							7.2	5000		20	20
117	goshye abohay	a/ yoryanos	non adopter	0	28	male	read and write	married	5	1	1	no	no	3	yes	no	no	5	low	yes	no	1	others	no						1	1	1							1				1.963	3000	2	4			1
118	lmlemu chomaw	1	adopter	1	25	male	read and write	married	2	0.5	0.5	no	no	1	yes	no	no	10	very low	no	no	1	others	no		1						1											0.2	25000	1	1			1
119	kasaye yimer	a/ yoryanos	adopter	1	50	female	read and write	divorced	4	2	2	no	no	20	no	no	no	15	13	no	no	1	others	no		1				1		1		4					2				1.496	3000		6	1
120	lakech yambelie	a/ yoryanos	adopter	1	30	female	read and write	married	5	1	1	no	no	2	yes	no	no	15	very low	yes	yes	1	others	no		1				1		1		2					5				1.275	5000		6	6
121	aderajew mekurya	a/ yoryanos	adopter	3	45	male	read and write	married	7	2	1.5	yes	yes	10	yes	yes	yes	20	very low	yes	yes	4	once a month	no	0.5	1				2	2	3				1	1						5.9	6000		10	10
122	gashaw mekuryaw	a/ yoryanos	adopter	2	35	male	read and write	married	6	1	1	no	no	6	no	yes	no	10	very low	no	no	2	once a month	no		1				1	1	2				1							2.85	2000		6	10
123	ayesew bere	a/ yoryanos	adopter	2	50	male	illiterate	married	4	1.5	1	yes	no	20	yes	no	no	10	medium	no	no	2	once a month	no	0.25	1			0.25	1	2	2											3.15	5000		8	8
124	sisay takele	a/ yoryanos	adopter	1	42	male	illiterate	married	8	1	1	no	no	10	yes	no	no	5	low	no	no	1	once a month	no		1					1		1										1.75	3600		4	4
125	tenaw asfaw	a/ yoryanos	adopter	2	40	male	illiterate	married	7	1.5	1	no	no	15	no	yes	no	20	low	no	no	3	once a month	no	0.5	1				1	2	1		10		2	3	1					10.05	3000		6	6
126	tiruye getahun	a/ yoryanos	non adopter	0	45	female	read and write	widowed	3	2	2	no	no	7	yes	no	no	7	very low	no	no	1	once a month	yes								1											0.2	2000	1	3			3
127	mesfin nebbyaw	a/ yoryanos	non adopter	0	65	male	read and write	married	5	1	1	no	no	30	no	no	no	20	low	no	no	1	once a month	no						1	2	1	1	10		1							5.7	1500	1	4			4
128	amlaku kasa	a/ yoryanos	non adopter	0	27	male	read and write	married	4	0.5	0.5	no	no	6	no	no	no	20	medium	no	no	1	once a month	yes							1	1											1.2	3000	1	2
129	agegnew dese	a/ yoryanos	adopter	1	50	male	read and write	married	5	1	1	no	no	20	yes	yes	no	5	low	no	no	1	once a month	no			1					1		4		2							2.12	5000		4		4
130	abraham	a/ yoryanos	adopter	1	40	male	read and write	married	8	2	2	no	no	6	yes	no	no	10	very low	no	no	1	twice a month	no		1						1											0.2	2500		6
131	solomon	a/ yoryanos	adopter	2	46	male	read and write	married	4	2	2	no	no	7	yes	yes	no	20	low	no	no	3	twice a month	no		2						2											0.4	2000	1	15	2		1
132	ayalew nebe	a/ yoryanos	adopter	2	45	male	read and write	married	5	1	1	no	no	20	no	no	no	3	high	no	no	2	three times a month	no		2																	0	5000		8	8
133	teshome	sakdebrl	adopter	2	52	male	read and write	married	8	2.5	2	no	no	20	no	no	no	45	low	no	yes	3	three times a month	no	0.5	2				1	1	2					2						4.35	1500	1	4	4
134	kasa bekele	sakdebrl	non adopter	0	90	male	illiterate	married	2	2	2	no	yes	50	no	no	yes	35	medium	no	no	2	three times a month	no							1	1	1										1.95	1200	1	2
135	mihret adugna	sakdebrl	adopter	1	35	male	read and write	married	4	2	2	yes	yes	10	yes	no	no	50	very low	no	no	1	four times a month	no		1				1	2	1	1	10									5	700		4	4
136	zenaw wob	sakdebrl	adopter	2	38	male	read and write	married	6	3	2	yes	no	1	yes	no	no	35	very low	no	no	2	once a month	no	1	2					2												2	1000		6	6
137	nebere muche	sakdebrl	adopter	1	45	male	read and write	married	7	2	2	yes	yes	15	no	yes	yes	11	very low	no	no	1	once a month	no		1				1	2	1	1	10		1	1						6.8	1500		3	3
138	mershaw manegerew	sakdebrl	adopter	2	43	male	illiterate	married	5	2.5	2	yes	yes	10	no	no	yes	45	medium	no	no	2	twice a month	yes	0.5	2				1	2	2	1	5									4.55	2000		8	8
139	mekonen mekuryaw	sakdebrl	adopter	2	45	male	read and write	married	6	1	1	yes	yes	1	no	no	no	45	very high	no	no	2	twice a month	no		2																	0	1500		6	6
140	amare adugna	sakdebrl	adopter	1	40	male	read and write	married	8	2	1.5	no	yes	10	yes	no	no	50	very low	no	no	1	twice a month	no	1	1				1	2	1	1	4		1	1		6				6.098	1000		3	3
141	syum getaneh	sakdebrl	adopter	3	50	male	read and write	married	5	2	2	yes	yes	6	yes	yes	no	50	very high	yes	no	3	twice a month	no			3					2	1				3			2			4.456	2000		12		12
142	kasaw tadese	sakdebrl	adopter	1	35	male	illiterate	married	4	0.75	0.5	no	no	30	no	yes	no	20	medium	no	no	1	twice a month	no	0.125						2	1							2				2.226	1000		4
143	agche azanie	sakdebrl	adopter	2	38	male	read and write	married	7	1.5	1.5	yes	yes	15	no	yes	no	45	low	no	no	2	twice a month	no			2			1	2	1		5		1				4			4.312	800		4		4
144	agegnew smegnew	sakdebrl	adopter	2	70	male	illiterate	divorced	7	2	2	no	yes	30	no	no	yes	50	medium	yes	no	3	once a month	no		2					1	2							3				1.439	2000	1	6	6		1
145	bewket ezezew	sakdebrl	adopter	1	35	male	read and write	married	6	1	1	yes	yes	10	yes	no	no	11	low	no	no	1	three times a month	no		1				1	1	1		4									2.47	900		6	6
146	destaw negash	sakdebrl	adopter	1	38	male	read and write	married	4	0.75	0.75	no	no	5	no	no	no	11	very low	no	no	1	three times a month	no			1			1	2	1	1	4									4.22	1000		3		3
147	derso teshome	sakdebrl	adopter	1	46	male	read and write	married	5	0.75	0.75	no	yes	10	no	yes	no	13	high	no	no	1	three times a month	no		1				1	1			10		2	1						5.55	1500		6	6
148	kes teshome abebe	sakdebrl	adopter	1	70	male	read and write	single	3	2	2	yes	no	6	no	no	no	45	medium	no	no	2	three times a month	no		1				2	1	1	1	3	3		1		5				5.395	50	1	2	4		2
149	mulye kasaye	sakdebrl	adopter	1	40	male	read and write	married	7	1.5	1.5	no	yes	20	no	no	no	35	medium	no	no	1	three times a month	no						1	2	1	1	6		1	1		4				6.332	800		4
150	musie samuel	sakdebrl	non adopter	0	50	male	illiterate	married	4	0.5	0.5	no	yes	20	no	yes	no	35	low	no	no	2	three times a month	no						1	1		1				1		3				3.639	400	2	4			4
151		adeba	non adopter	0	35	male	illiterate	married	5	1.5	2	no	no	5	no	no	no	2	high	no	no	1	others	no		0	0	0		0	1	0	0	2	0	1	0	0	0	0	0	0	1.96	1200	1	1	0	0	1
152	Anchinalu	Ayiba	adopter	1	60	female	illiterate	widowed	5	0.5	2	no	no	30	yes	no	no	7	low	no	no	1	others	no				1		2	1	1	0	0	0	1	1	0	0	0	0	0	4.5	1800	1	1
153	Gigu kefle	Ayiba	non adopter	0	55	male	illiterate	married	5	0.5	2	no	no	10	yes	no	no	5	low	no	no	1	four times a month	no		0	0	0		1	0	1	0	0	0	0	0	0	0	0	0	0	0.95	1700	1	1
154	Mulu belay	Ayiba	non adopter	0	75	male	read and write	married	5	4	2	no	no	50	no	yes	no	6	very low	no	no	1	three times a month	no		0	0	0		0	0	1	0	0	0	0	0	0	0	0	0	0	0.2	2000	1	0	0	0	1
155	setu	Ayiba	adopter	1	45	female	read and write	married	8	1.5	1.5	no	no	20	yes	no	yes	2	very low	no	no	1	four times a month	no	0	0	1	0	0	2	1	1	0	0	3	1	0	0	0	0	0	0	3.79	2300	0			2
156	Fikradis	Ayiba	non adopter	0	32	female	read and write	widowed	4	6	2	no	no	6	yes	yes	yes	15	very low	no	no	1	others	no		0	0	0		0	2	1	0	2	0	1	0	0	0	0	0	0	3.16	1500	1	2	0	0	2
157	tegegn	Ayiba	non adopter	0	44	male	read and write	married	2	2	2	no	no	5	yes	no	yes	4	very low	no	no	1	others	no		0	0	0				1											0.2	1500	1	2			2
158	kibret	Ayiba	non adopter	0	60	male	read and write	married	6	1.5	2	no	no	1	no	no	yes	10	very low	no	no	1	others	no								1											0.2	1700	1	2			2
159	kefale	Ayiba	non adopter	0	40	male	illiterate	married	6	4	4	no	no	5	yes	no	yes	20	low	no	no	2	once a month	no						1	1	2	1					10					13.9	2000	2	5			5
160	chalie	Ayiba	non adopter	0	40	male	illiterate	married	8	2	1.5	no	no	25	no	no	yes	13	very low	no	no	2	four times a month	no	0.5					2	2	2				2			5				5.365	4000	2	4			4
161	takele	Ayiba	non adopter	0	35	male	illiterate	married	5	1	2	no	no	10	no	no	yes	9	very low	no	no	1	others	no						1	2	1							6				3.028	3100	1	3			3
162	kefale	Ayiba	non adopter	0	60	male	read and write	married	3	12	2	no	no	40	no	no	yes	20	low	no	no	1	others	no						2	2	1											3.7	3300	1	2
163	huluager	Ayiba	non adopter	0	52	female	illiterate	widowed	5	1.5	2	no	no	12	no	no	yes	30	very low	no	no	1	others	no						2		1		2		1			5				2.725	1800	1	2			2
164	eyayu	ayiba	non adopter	0	40	male	read and write	married	4	1	2	no	no	30	no	no	no	10	low	no	no	1	others	no							2			4		4			7				5.411	2300	1	4			4
165	gashaw	ayiba	non adopter	0	41	male	read and write	married	7	2	2	no	no	20	yes	yes	yes	5	low	no	no	2	others	no						1		1	3						1				3.213	3200	2	5			5
166	bitweded	ayiba	non adopter	0	30	male	read and write	married	5	2	2	no	yes	4	yes	yes	no	3	low	yes	yes	1	others	no						1	1	1	2			1							4.15	3000	1	6			6
167	ayito	ayiba	adopter	1	56	male	read and write	married	5	2.5	2	no	yes	20	yes	yes	no	5	medium	no	no	1	others	no							2	1	1			1							3.65			6	6
168	yeshambel	ayiba	adopter	1	35	male	illiterate	married	3	1.5	2	no	no	10	yes	yes	no	5	very low	no	yes	1	others	no		1				2	2	1		1					10				3.96	2800		7	7
169	dessie	Ayiba	adopter	1	35	male	illiterate	married	5	2.5	2	no	no	1	no	no	no	30	very low	no	no	1	others	no		1						1							5				0.265	2500		6	6
170	genetu	2	adopter	4	60	male	illiterate	married	7	2	2	yes	no	2	no	no	no	5	very low	yes	no	5	twice a month	no						1	5	2								6			6.168	10000	1	22		9	13
171	chanyalew	2	adopter	1	50	male	illiterate	married	9	2	2	yes	no	4	no	yes	no	30	very high	no	no	2	others	no						2	2	2				2							5.3	1200	2	4			2
172	maru	3	non adopter	0	36	male	read and write	married	6	1	2	yes	no	1	yes	no	no	40	low	no	no	1	three times a month	no							2	1	1						5				3.015	700	1	3			3
173	yalganesh	2	non adopter	0	60	female	illiterate	divorced	8	2	2	no	no	2	no	no	no	5	high	no	no	1	others	no						1		1	1										1.7	500	2	2			2
174	tefera	3	adopter	1	35	male	illiterate	married	5	1	2	yes	no	2	no	no	no	30	medium	no	yes	1	others	no					0.5	1	1	1	1										2.7	900		3		3
175	maru	2	adopter	1	32	male	illiterate	single	4	2	2	no	no	1	yes	no	no	40	medium	yes	no	2	twice a month	no						2		1	2										3.2	700	1	3		2	1
176	tiruye	4	non adopter	0	28	female	illiterate	married	2	0.5	2	no	no	1	no	no	no	30	medium	no	no	1	others	no						1		1	1	2					3				1.999	500	1	2			2
177	hareg	2	non adopter	0	45	female	illiterate	married	6	2	2	yes	no	4	no	no	no	30	medium	no	yes	2	others	no						1		1											0.95	1000	2	4			4
178	abibo	4	adopter	3	32	male	above	married	4	1.5	15	no	no	2	no	no	no	20	low	no	no	4	twice a month	no		3					2	2			7				2				3.336	800	1	5	2		1
179	kesis nigerew	3	adopter	1	38	male	read and write	married	8	2	2	no	no	8	no	yes	no	40	low	no	yes	1	three times a month	no		1						1	1			2			7				2.441	1200		4	4
180	tsegaye	4	adopter	1	30	male	above	married	3	0.5	2	no	no	1	no	no	no	30	high	no	no	5	four times a month	no																			0	700	1	2		2
181	mare	3	adopter	2	40	female	read and write	married	4	3	1	yes	no	7	no	no	no	12	high	yes	yes	1	twice a month	no	1	2			1	1	1					1			3	1			2.492	1000		6	6
182	mola	janga	adopter	1	50	male	illiterate	married	8	3.5	3	no	no	30	no	no	no	27	high	no	no	2	twice a month	no	0.5		1			1	2	2		2		1			2				4.136	2500	1	2		1	1
183	abebe	janga	non adopter	0	60	male	illiterate	married	7	6	2	no	no	25	no	no	no	23	high	no	no	1	twice a month	no							2	1	1	2									3.21	1200	2	2			2
184	mulaw	2	adopter	3	30	male	illiterate	single	2	15	2	yes	yes	3	no	yes	yes	10	high	yes	yes	4	twice a month	no	3		3		10	1	1	3											2.35		1	14		11	3
185	abebe	4	non adopter	0	35	male	read and write	widowed	1	0.5	2	no	yes	1	yes	no	no	30	high	no	no	2	once a month	no						1	2	2				2			5				4.615	700	2	4			4
186	geremew	janga	non adopter	0	33	male	illiterate	divorced	5	4	2	no	no	5	no	no	no	50	high	no	no	1	once a month	no						1	1	1	1			2			8	1			4.207	1500	1	1			1
187	tarko	3	adopter	2	55	male	illiterate	married	4	6	4	no	yes	4	no	no	no	30	high	no	no	2	once a month	no	1.5		2		0.5	1		2	1			2			6	2			3.384	5000	1	4		4
188	kesis yigzaw	Ayinba	adopter	1	35	male	read and write	single	4	1	2	no	no	10	yes	no	no	10	low	no	no	1	others	no						1									5				0.815	1500		3		3
189	worku	Ayinba	non adopter	0	70	male	illiterate	married	9	2	2	yes	yes	22	no	no	no	8	high	no	no	1	once a month	no								1							6				0.278	2000	1	2			2
190	tatek	Ayinba	adopter	1	40	male	read and write	married	6	2	2	no	no	4	yes	no	no	25	very low	no	no	1	others	no		1																	0	2000		4	4
191	gashaw	janga	non adopter	0	35	male	illiterate	married	6	4.5	2	no	no	10	no	no	no	50	low	no	no	1	once a month	no							1	1	2			2							4.1	1300	1	2			2
192	Yelibe	4	non adopter	0	48	male	read and write	married	9	5	5	yes	no	7	no	no	yes	10	high	yes	yes	3	twice a month	no						1	1	3	1			2			2				4.526	2000	3	4			2
193	Emuhay	janga	non adopter	0	60	male	illiterate	single	13	6	4	no	no	15	no	no	no	40	high	no	no	2	once a month	no						2	2	2							2	2			3.932	3000	2	2			2
194	Alebie	4	adopter	1	32	male	read and write	married	6	1	2	yes	no	8	yes	yes	no	10	high	no	no	2	twice a month	no			1			1		2	1										1.9	1000	1	4		2	2
195	kurie	janga	non adopter	0	35	male	illiterate	married	7	2.5	2	no	no	3	no	no	no	50	high	no	no	2	once a month	no						1	1	2		2									2.41	1000	2	2			2
196	tubiew	3	adopter	1	58	female	read and write	single	8	6	3	no	no	6	no	no	no	20	very low	no	no	1	once a month	no			1		1	2	1	1											2.7	12000		2		2
197	mantegbosh	2	adopter	1	40	male	illiterate	married	9	1	2	no	no	6	yes	yes	no	60	very low	no	no	1	others	no		1				1	4	1											4.95	2000		4	4
198	Mandefro	3	adopter	3	50	male	read and write	married	9	3	2	no	no	10	yes	no	no	20	low	yes	no	3	twice a month	no		3				1	3								2				3.776	1500		8	8
199	misganaw	janga	non adopter	0	45	male	read and write	married	8	6	2	no	no	15	no	no	no	20	high	no	no	1	once a month	no						2	2	1		1									3.83	1500	1	2			2
200	Abay	3	adopter	4	28	male	above	single	2	2	2	yes	no	0.5	no	no	no	30	low	no	no	6	once a month	no			4			3		6							2				3.476	2000	2	8		6	2
201	Aster	3	adopter	1	33	female	illiterate	single	6	5	2	no	no	2	no	no	no	10	low	no	no	1	others	no			1			1		1	1										1.7	1000		2		2
202	Marelgn	2	adopter	1	60	male	read and write	married	14	2	2	no	no	15	yes	no	no	10	very low	no	no	1	twice a month	no			1					2	2						9				2.017	800		3		3
203	tilksew	3	adopter	1	36	male	illiterate	married	4	0.5	2	yes	yes	2	no	yes	no	5	very low	no	no	1	four times a month	no			1			2	1	1							6				2.778	300		3		3
204	Enana	2	adopter	1	42	female	illiterate	married	5	2	2	no	no	3	no	no	no	15	very low	no	no	2	others	no		1				1		2											1.15	1000	1	4	3		1
205	Marie	2	adopter	3	38	female	illiterate	married	5	2	2	no	no	5	no	no	no	20	very low	no	no	3	others	no	1	1				1		3											1.35	4000	2	6
206	Abuhay	3	adopter	1	50	male	read and write	married	29	4	2.5	no	no	10	no	no	yes	20	low	no	no	1	twice a month	no		1				2	2	1											3.7	2000		3
207	Chanyalew	2	non adopter	0	54	male	read and write	married	6	2	2	yes	no	10	no	no	no	30	very low	no	no	2	twice a month	no	1					2	2	2				2							5.3	2000	2	3			3
208	Kagnew	3	adopter	1	41	male	illiterate	married	7	4	2	no	no	7	no	yes	no	6	very low	no	no	1	twice a month	no	0.5		2		1.5		1	1											1.2	1000		4		4
209	Terefe	3	adopter	1	37	male	illiterate	married	5	1	1	no	no	7	no	yes	no	10	low	no	no	1	twice a month	no		1				2	2	1				1			3				4.439	1000		2	2
210	Melkie	Janga	adopter	1	45	male	read and write	married	7	1.5	2	no	no	6	no	no	no	30	low	no	no	1	three times a month	no						1	2	1		2		1			2	1			3.939	1000	1	1			1
211	gebrie	Janga	adopter	2	45	male	illiterate	married	6	0.5	2	yes	yes	17	no	no	no	30	high	no	no	2	twice a month	no			2			2	1	2	1						6	5			3.743			2		2
212	Dersu	Janga	non adopter	0	40	male	illiterate	married	10	4	1	no	no	8	no	no	no	40	medium	no	no	1	others	no						1	2	1	1										3.7	1000	1	1			1
213	Adissie	Janga	non adopter	0	37	male	read and write	married	6	3	1.5	no	no	3	no	no	no	40	very low	no	no	2	twice a month	no							2	2	1			1			2				3.876	600	2	2			2
214	Alemtsehay	3	non adopter	0	33	female	illiterate	married	7	200	2	no	no	4	no	no	no	6	very low	no	yes	2	twice a month	no					2	1		2							7				1.241	1000	2	2			2
215	Shumet	3	adopter	2	32	male	read and write	married	7	4	1.5	no	no	5	no	no	no	12	high	no	no	2	twice a month	no			2			1	2	2											3.15	1500		4
216	Mero	3	adopter	1	27	male	read and write	married	5	2	2	yes	no	2	no	no	no	50	high	yes	no	1	twice a month	no		1				2	2	1											3.7	1000		2	2
217	Rigb	3	adopter	1	37	male	read and write	married	6	2	2	no	no	6	no	no	no	6	medium	no	yes	2	twice a month	no			1			2	2	2							5				3.965	3000	1	3		2	1
218	Asnakew	Gebebesilj	adopter	1	60	male	read and write	single	5	12	7.5	yes	no	2	yes	no	yes	35	medium	yes	yes	1	others	no	0.5	1			4		2	1							4				2.252	2700		4	4
219	Adugna	Gebebesilj	adopter	1	45	male	illiterate	single	6	13.5	3	yes	no	12	no	no	yes	35	low	yes	yes	2	others	no	0.5	1			10		2	2	2	4		2					2		7.32	2500	1	4	2		2
220	Alemu	Gebebesilj	non adopter	0	45	male	illiterate	married	6	6	1.5	no	no	20	no	no	no	35	low	no	no	1	twice a month	no	0.5				4		2	1							3				2.239	3000	1	6			6
221	Abiye	Chilo	adopter	5	50	male	above	married	7	3	2	yes	no	25	no	no	no	30	high	no	no	3	twice a month	no		3	2				2	2							25	3			2.734	3500	2	5	3	2
222	simachew	gebebesilj	adopter	1	38	male	read and write	single	7	4	2	no	no	6	yes	no	no	8	very low	no	no	2	twice a month	yes					2	2	2	2	2						5				5.465	3000	1	2		1	1
223	amsal	salja	adopter	1	35	male	read and write	married	8	4.5	2	no	no	10	no	no	no	30	low	no	no	2	twice a month	no							2	2				3				3			4.509	1500	1	2	1.5		1
224	Chekole	salja	adopter	1	30	male	illiterate	married	4	2	2	no	no	2	no	yes	no	20	very low	no	no	2	twice a month	yes								2											0.4	1500	2	2			2
225	Adino	gembebdembesgie	adopter	1	35	male	illiterate	married	7	4	4	no	no	10	no	no	no	20	very low	no	yes	2	twice a month	no		1				1	1	2									2		3.65	1700	1	4	2		2
226	Babey	gebebdmbesgie	adopter	2	32	male	illiterate	divorced	3	1	2	no	no	13	no	no	no	15	very low	no	no	2	others	no	0.25		2			1	2	1	1	2		1				2			4.666	600		4		2
227	tefera	gebebsilj	non adopter	0	68	male	read and write	married	10	6	5.5	yes	no	15	no	no	no	30	medium	yes	no	2	others	no	0.5					2	3	1		2		2							6.36	3000	2	2			2
228	tigabie	salja	non adopter	0	78	male	illiterate	married	7	3	2	no	no	50	no	no	no	15	high	no	no	1	twice a month	no					2	1	1												1.75	1500	1	2			2
229	nega	salja	adopter	2	55	male	read and write	married	6	4	3.5	no	no	17	no	no	no	15	very low	no	no	2	twice a month	no	0.5	2				2	3	2		2		1			4				5.912	2000		2	1		1
230	Asfie	Salja	adopter	1	45	male	read and write	married	7	2	2	yes	yes	2	yes	yes	no	25	low	no	no	1	others	no						2	2	2			1	1			4				4.782	1600	2	2			2
231	Ayelgn	Salja	non adopter	0	70	male	illiterate	married	7	3.25	3	no	no	15	no	yes	no	8	high	no	no	2	others	no					0.25	1	1	2							3				2.189	1600	2	2			2
232	Agerie	gebebesalij	adopter	2	38	female	above	widowed	3	3	2	yes	no	3	yes	no	no	2	high	yes	yes	2	twice a month	no		2			2	1		2							2				1.176	1500	3	5	2		3
233	workie	gebebssilj	adopter	2	45	male	read and write	married	5	5	4	yes	no	4	yes	no	no	40	medium	yes	yes	4	twice a month	no	0.5	3	3		1	1	3	2		3					10				4.67		2	3	2	2
234	tarko	saljigebebe	non adopter	0	52	male	read and write	married	6	6.5	2	yes	no	10	no	no	no	40	very low	no	no	2	others	no					2	1	4	1	2	3		2			4				8.292	1500	2	2			2
235	Abebe	ebebesalij	non adopter	0	40	male	read and write	married	8	2	2	no	no	17	no	no	no	25	very low	no	no	1	others	yes					2	2	2												3.5	1600	1				1
236	Nigusie	salijgebeba	non adopter	0	45	male	read and write	married	6	3	1.5	no	no	30	no	yes	no	2	low	yes	no	2	others	no					2	1	2	2	1			1			3				4.639	2000	2	2
237	Gebrie	salij	non adopter	0	35	male	illiterate	married	6	2.5	2	no	no	4	no	no	no	15	medium	no	no	2	twice a month	no					2	2	2	1	1						5				4.515			2			2
238	gezahegn	gebebedembesgie	non adopter	0	42	male	illiterate	married	6	1.5	2	no	no	11	no	yes	no	22	very low	no	no	2	twice a month	no						1	2												2.75	1400	2	4
239	Bizuayehu	gebibasilja	adopter	1	50	male	illiterate	widowed	4	4	2	no	no	20	yes	no	yes	20	very low	yes	no	1	others	no			1		2			1							6				0.278			2
240	Zewudu	Ayiba	adopter	1	54	male	read and write	married	8	1	2	no	no	25	no	no	yes	30	very low	yes	yes	1	others	no						2	1	1		4					6				3.298	2000		6		6
241	Mola	sankatikim	non adopter	0	70	male	illiterate	married	9	9	7	no	no	50	no	yes	no	40	low	no	no	2	others	no	1				1	1	2	1	1	9			1		13				6.139	1100	2	4			4
242	Birara	santakim	non adopter	0	60	male	illiterate	married	9	6	5	no	no	30	no	no	no	50	low	no	no	2	others	no	0.25				0.25	1	2	1	1	8		1	1		8				6.644	1200	2	3			2
243	ayanaw	sankatkim	non adopter	0	60	male	illiterate	married	6	6	5	no	no	30	no	no	no	45	medium	no	no	2	others	no	0.25				0.25	1	2	1	2	6		1	1		8				7.134	950	2				4
244	awoke	sankatkim	adopter	1	40	male	illiterate	married	8	9	8	no	no	23	no	no	no	60	medium	no	no	2	once a month	no	1	1			2	2	2	2	1	17	5	1	1		10		1		10.19	1000	1	4	2		2
245	mulat	sankatikim	adopter	2	50	male	read and write	married	7	8	6	yes	yes	37	no	no	no	60	medium	no	no	2	twice a month	no	0.5	1	1		2	2	2	2	2	25	7	2	1	2	15				14.455	1500	1	4	2	2	2
246	choraw	sankatikim	adopter	1	40	male	illiterate	married	7	8	6	yes	no	25	no	no	no	60	medium	no	no	2	once a month	no	2	1			2	2	2	2	2	25	3	1	1	1	12		2		13.596	1000	1	4	2	2	1
247	agegnew	sankatkim	non adopter	0	60	male	illiterate	married	5	8	7	no	no	30	no	no	no	31	low	no	no	2	others	no	0.25				0.25	1	2	1	1	17		2			13				7.479	900					4
248	yemataw	sankatkim	non adopter	0	48	male	illiterate	married	5	8	7	no	no	30	no	no	no	50	medium	no	no	2	twice a month	no	2				0.25	1	2	1	1	15		2	1		12				8.306	1200		4			4
249	demas	salijgebebe	non adopter	0	61	male	read and write	married	6	3	2.5	no	no	15	no	no	no	35	medium	yes	no	1	others	no	0.5				0.25		1	1							4				1.252	2500	1	6			6
250	fentahun	kosoyeambaras	non adopter	0	45	male	read and write	married	3	2	1.5	yes	no	20	no	no	no	90	high	no	no	2	once a month	no	0.5					1	1	1		7			1		8				4.064	1300	2	2			2
251	kasa bekele	kosoye	non adopter	0	75	male	illiterate	married	4	1.5	1.25	no	no	32	no	no	no	50	medium	no	no	2	others	no	0.25					1	1	3	1	3			3		3				6.829	1500	2	1			1
252	ayelign mamo	''	non adopter	0	54	male	illiterate	married	3	0.5	0.25	yes	no	23	no	no	no	100	low	yes	no	2	once a month	no	0.25					1	1			5			1		4				3.552	1200	2	2			1
253	gdebew sisay	'	adopter	1	52	male	read and write	married	5	0.75	0.5	no	yes	34	no	no	no	6	medium	no	no	2	three times a month	no	0.25					1	1	1		8		1		6		3			10.299	2000	2	2			3
254	tebje eshete	''	adopter	1	45	male	read and write	married	3	0.5	0.25	no	no	4	no	yes	no	40	medium	yes	no	2	once a month	yes	0.25					1		1		2			1		3				2.349	600	1	2			2
255	eshete	''	non adopter	0	65	male	read and write	married	4	1	0.75	no	no	40	yes	no	no	3	medium	yes	no	2	twice a month	no	0.25					2	2	2	1	7		1	2		6				8.538	500	1	2			2
256	adane zegeye	''	adopter	1	45	male	illiterate	married	3.25	1	0.75	no	no	30	yes	no	no	6	high	no	no	2	twice a month	no	0.25					1	1	2		7		1	2		4	6			6.03	2000	1	2			2
257	zegeye kasaw	''	adopter	1	34	male	above	married	4	1	0.75	no	no	5	no	no	no	15	high	yes	no	2	three times a month	no	0.25						1	1		2		1	1						3.26	1000	1	1			1
258	endeshaw kebede	''	non adopter	0	54	male	illiterate	married	4	0.5	0.25	yes	no	34	no	no	no	110	high	yes	no	2	three times a month	no	0.25				0.25	1	1	1		8			1		5				4.155	850	2	2			2
259	ayanaw gizachew	''	adopter	1	51	male	read and write	married	5	1	0.75	no	no	25	no	no	no	15	high	yes	no	2	twice a month	no	0.25					1	2	1	1	6			1		5				5.645		1	3			2
260	akilew tefera	''	adopter	1	50	male	read and write	married	5	1	0.75	no	no	12	yes	no	no	10	very high	no	no	2	twice a month	no	0.25					1	1	1		3		1	1		3				4.179	1300	1	2			2
261	melke asefa	''	non adopter	0	42	male	illiterate	married	5	0.5	0.37	no	no	19	yes	no	no	10	medium	no	no	2	twice a month	no	0.13						1	1		4					3				1.759	1200	2	1.5			2
262	moges gebiw	''	non adopter	0	38	male	read and write	married	3	0.5	0.25	yes	no	8	yes	no	no	90	high	yes	no	1	others	no	0.25						1	1	1	9		1	2		5				6.085	1000	1	2			2
263	getu molla	sanja	adopter	4	30	male	read and write	married	1.75	10	8	yes	no	1	no	no	no	20	very high	no	no	4	others	no	0.5				1.5	2	2	4	3								1		7.3	2700		3			1
264	alemu eshete	sanja	adopter	3	70	male	read and write	divorced	7.25	4	2	yes	no	40	no	no	no	15	high	no	no	5	others	no	1				1	1	2	2	1								1		4.65		2	5			2.5
265	habtamu ashebir	''	non adopter	0	33	male	read and write	single	1	15	10	no	no	10	yes	no	no	20	very high	no	yes	20	twice a month	yes	3				1.5	15	6	20	10		25	1					2		34.2		20	12			0.5
266	abebaw kasse	''	non adopter	0	68	male	illiterate	married	11.1	10	8	no	no	1	no	no	no	25	very high	no	no	2	others	yes	1				0.5	1	2	2	1										3.9	2000	2	2			1
267	birle anagre	''	adopter	4	37	male	read and write	married	5	12	8	no	no	7	no	no	no	2	very high	yes	no	5	others	yes	2					3	2	4	2		6	1			10				8.16			8			2
268	derjew yenewa	''	non adopter	0	50	male	read and write	married	4.45	2	2	yes	no	1	yes	no	no	23	very low	yes	no	4	others	no						2	4	4	1								1		7.8	2500	4	6
269	aregawi g/egizi	''	adopter	1	50	male	read and write	married	5	12	9	yes	yes	2	no	no	no	23	very high	yes	no	6	others	no	2				0.5	3	4	7	2		10	1					1		11.9	2500	5	4
270	sedeke malele	''	non adopter	0	39	male	read and write	married	5	0	10	no	yes	20	yes	no	no	5	low	no	no	11	others	no	0				0	4	4	8				1					1		10.05	2500	11	6			1.5
271	birle ashebir	''	adopter	15	38	male	read and write	married	5	15	10	no	no	15	yes	no	no	10	high	no	yes	15	others	no	5					20	4	15	8		50	1					3		37.45	4000		15			1
272	amare jemere	''	non adopter	0	38	male	above	married	4	15	10	yes	no	20	yes	yes	no	10	very low	no	no	8	others	no	4				1	6		8	12		40						2	6	21.8	3000	8	5			1
273	eyayeu abuhay	''	non adopter	0	43	male	above	married	4.55	20	15	yes	yes	6	yes	no	yes	10	very high	no	no	2	once a month	yes	5					7	2	2	8		5	2			4				15.752	2000	2	2			1
274	aynale azezew	k/egizizbher	adopter	1	60	female	illiterate	married	6.25	12	11	yes	no	7	no	no	no	30	very high	no	yes	1	twice a month	no	1	1				1	2	1	1	7		2			8				6.114	4000		3	3
275	misganaw baze	''	adopter	1	44	male	above	married	4.4	4	3.5	yes	no	11	no	no	no	20	very high	yes	yes	1	once a month	no	0.5	1				1	2	1		5		1			5	2			4.371	3500		4	4
276	mola haile	''	adopter	1	44	male	read and write	married	3.3	4	3.5	yes	no	9	no	no	yes	3	very high	no	yes	1	once a month	no	0.5		1			2	2	1		3		2			4				5.542	6000		3		3
277	endalik alemu	''	adopter	0	42	male	above	married	2.5	5.5	4	no	no	10	no	no	no	15	high	yes	yes	1	twice a month	no	1.5	2				2	2	3		13		2			2				7.216	3000	2	6	6
278	adhak ferya	kereker	adopter	1	29	female	illiterate	divorced	3.25	3	2	yes	no	2	no	yes	yes	10	very high	yes	no	1	once a month	no	1	1				1		1		4		1			14				2.352	600		6	6
279	abebe teshome	''	adopter	3	50	male	read and write	married	4.65	8	2	yes	no	4	yes	yes	yes	20	very high	yes	no	3	once a month	no		3			0.5		2	3		14	5	2			16		1		7.428	1000		18	6
280	aweke mekonte	''	adopter	2	42	male	read and write	married	6.75	2	8	yes	no	2	no	yes	yes	20	very high	no	no	2	once a month	no	6	2			2	3	2	2	1	14		2			16				8.828	1200		10	10
281	maru teshome	k/egizizbher	adopter	2	45	male	above	married	3.75	6	5	yes	no	8	no	no	no	15	very high	yes	yes	2	once a month	no	1		2				2	2		4		1			6				3.698	4000		6		6
282	worku teshome	''	adopter	1	49	male	read and write	married	3.5	7	6	yes	no	10	no	no	no	10	high	no	yes	1	once a month	no	1	1				1	2	1		3		1			6				4.118	5000		4	4
283	belete alebachew	''	adopter	1	55	male	above	married	4.5	4	3.5	yes	no	5	no	no	no	30	high	yes	yes	1	twice a month	no	0.5	1				1	2	1		3		3			5	2			5.511	6000		4	4
284	aweke tase	kereker	adopter	1	38	male	read and write	married	5.15	5	4	yes	no	2	no	yes	yes	15	high	yes	no	1	once a month	no	1	1			1	2	2	2	1	19		2			11				8.663	800		5	5
285	habtu abibol	''	adopter	1	38	male	read and write	married	4.3	4	3	yes	no	2	yes	yes	yes	2	high	yes	no	1	once a month	no	1	1			0.5	1	2	1							7				3.041	1000		7	7
286	rufael chekol	k/egizizbher	adopter	1	43	male	above	married	4.1	8	6	yes	no	12	yes	no	no	3	high	no	yes	1	twice a month	no	2	1			2			1		3					6				0.668	5000		4	4
287	alemu ayele	''	adopter	2	74	male	illiterate	married	8.25	12	9	yes	no	12	no	no	no	10	high	no	yes	2	once a month	no	3	2				1	2	2		10		2			8				5.954	6000		8	8
288	negasi haile	''	adopter	2	55	male	above	married	6.3	8	5	yes	yes	13	no	no	no	20	very high	no	yes	2	once a month	no	3	2					2	2	1	10		1			5				5.215	2000		9	9
289	adane tasew	kereker	adopter	3	45	male	read and write	married	4.65	8	5	yes	no	4	yes	yes	yes	15	very high	yes	no	3	once a month	no	3	3			0.2	7		3		16	7	2			21		1		11.263	2000		15	5
290	dessie zeene	''	adopter	1	40	male	read and write	married	4.85	5	3	no	no	3	yes	yes	yes	3	very high	yes	no	1	once a month	no	2	1			0.5	1	2	1		5	8	2			14				6.222	800		8	8
291	kenaw chekol	''	adopter	1	46	male	read and write	married	5.25	5	4	yes	no	2	yes	yes	yes	15	very high	yes	no	1	once a month	no	1	1			0.5	1	3	1		11		3			7				7.571	1000		7	7
292	demoze teshome	''	adopter	1	30	male	read and write	married	4	4	3	yes	no	2	yes	yes	yes	20	very high	yes	no	1	once a month	no	1	1			0.5	2	2	1		7		1			14				5.492	800		7	7
293	getahun abibual	''	adopter	1	32	male	above	married	3.1	3	2	yes	no	2	yes	yes	yes	4	high	yes	no	1	once a month	no	1	1			0.5			1							8				0.304	600		4
294	dessie kinidu	''	adopter	1	40	male	read and write	married	5.25	5	2	yes	no	3	yes	yes	yes	3	very high	yes	no	1	once a month	no	2	1			0.5	1	2	1		4	9	2			11				6.183	800		6	6
295	abibual dmisew	''	adopter	2	62	male	read and write	married	5.3	9	5	no	no	5	yes	yes	yes	3	low	yes	no	2	once a month	no	4	2			0.5			2				1			13				1.269	1200		20	20
[truncated: 199 more columns]
